# Combining genetic crosses and pool targeted DNA-seq for untangling genomic variations associated with resistance to multiple insecticides in the dengue vector *Aedes aegypti*

**Short title:** Genomic variations associated with insecticide resistance in the dengue vector *Aedes aegypti*

Julien Cattel<sup>1</sup>, Frédéric Faucon<sup>1</sup>, Bastien Lepéron<sup>1</sup>, Stéphanie Sherpa<sup>1</sup>, Marie Monchal<sup>1</sup>, Lucie Grillet<sup>1</sup>, Thierry Gaude<sup>1</sup>, Frederic Laporte<sup>1</sup>, Isabelle Dusfour<sup>2</sup>, Stéphane Reynaud<sup>1</sup>, Jean-Philippe David<sup>1\*</sup>

<sup>1</sup> Laboratoire d'Ecologie Alpine (LECA), UMR 5553 CNRS - Université Grenoble-Alpes, Grenoble, France.

<sup>2</sup> Institut Pasteur de la Guyane, Cayenne, France.

\* Corresponding author

E-mail: [jean-philippe.david@univ-grenoble-alpes.fr](mailto:jean-philippe.david@univ-grenoble-alpes.fr)

## 1 **Abstract**

2 In addition to combating vector-borne diseases, studying the adaptation of mosquitoes to  
3 insecticides provides a remarkable example of evolution-in-action driving the selection of  
4 complex phenotypes. Indeed, most resistant mosquito populations show multi-resistance  
5 phenotypes as a consequence of the variety of insecticides employed and of the complexity  
6 of selected resistance mechanisms. Such complexity makes challenging the identification of  
7 alleles conferring resistance to specific insecticides and prevents the development of  
8 molecular assays to track them in the field. Here we showed that combining simple genetic  
9 crosses with pool targeted DNA-seq can enhance the specificity of resistance allele's  
10 detection while maintaining experimental work and sequencing effort at reasonable levels. A  
11 multi-resistant population of the mosquito *Aedes aegypti* was exposed to three distinct  
12 insecticides (deltamethrin, bendiocarb and fenitrothion) and survivors to each insecticide  
13 were crossed with a susceptible strain to generate 3 distinct lines. F2 individuals from each  
14 line were then segregated with 2 insecticide doses. Bioassays supported the improved  
15 segregation of resistance alleles between lines. Hundreds of genes covering all detoxifying  
16 enzymes and insecticide targets together with more than 7,000 intergenic regions equally  
17 spread over mosquito genome were sequenced from pools of F0 and F2 individuals  
18 unexposed or surviving insecticide. Differential coverage analysis identified 39 detoxification  
19 enzymes showing an increased gene copy number in association with resistance. Combining  
20 an allele frequency filtering approach with a Bayesian  $F_{ST}$ -based genome scan identified  
21 multiple genomic regions showing strong selection signatures together with 50 non-  
22 synonymous variations associated with resistance. This study provides a simple and cost-  
23 effective approach to improve the segregation of resistant alleles in multi-resistant  
24 populations while reducing false positives frequently arising when comparing populations  
25 showing divergent genetic backgrounds. The identification of these insecticide resistance  
26 markers paves the way for the design of novel DNA-based resistance tracking assays.

27

28 **Key words:** Insecticide resistance, Mosquito, *Aedes aegypti*, Copy Number Variations,  
29 Polymorphism, Complex phenotype, Detoxification enzymes, Cytochromes P450.

## 30 **Author summary**

31 In addition to combating vector-borne diseases, understanding how mosquitoes adapt to  
32 insecticides provides a remarkable example of evolution-in-action. However, the variety of  
33 insecticides used and the complexity of adaptive mechanisms make it difficult to identify the  
34 genetic changes conferring resistance to each insecticide. Here we combined simple  
35 controlled crosses with mass DNA sequencing for enhancing the specificity of resistance  
36 gene detection. A multi-resistant mosquito population was exposed to three distinct  
37 insecticides and survivors were crossed with a susceptible strain to generate 3 distinct  
38 mosquito lines. Individuals from the second generation of each line were then segregated  
39 based on their resistance to each insecticide. Bioassays supported the improved  
40 segregation of genetic resistance markers between lines. Hundreds of genes potentially  
41 involved in resistance together with thousands non-genic regions equally spread over  
42 mosquito genome were sequenced from individuals from each line. Genomic analyses  
43 identified detoxification enzymes showing an increased gene copy number in association  
44 with resistance and multiple genomic regions showing strong selection signatures and  
45 carrying point mutations associated with resistance. Such approach improves the specificity  
46 of resistance gene detection in field mosquito populations resisting to multiple insecticides  
47 and paves the way for the design of novel DNA-based resistance tracking tools.

## 48 Introduction

49 Natural populations experience a variety of selective pressures, leading to the accumulation  
50 of locally adaptive features and the expression of complex phenotypes [1]. Environmental  
51 changes driven by man-made disturbances can alter the course of selection, by inducing  
52 novel, particularly strong and sometimes unpredictable selective pressures. Understanding  
53 how natural populations respond to rapid environmental changes has become a major goal,  
54 and an increasing number of studies reported adaptive changes on very short timescales [2-  
55 4]. Resistance of insects to insecticides is a key example of rapid evolution under novel and  
56 strong selective pressures associated with human activities. This adaptive phenotype has  
57 evolved quickly and independently in a large number of taxa [5]. However, natural resistant  
58 populations often exhibit complex resistance phenotypes as a consequence of the variety of  
59 insecticides used, the intensity of the selection pressures, and the selection of mechanisms  
60 conferring resistance to multiple insecticides, making the identification of resistance alleles  
61 challenging [6, 7]. Besides contributing to the understanding of rapid adaptation and the  
62 origins of complex traits, deciphering the complexity of insecticide resistance mechanisms  
63 could help improving risk assessments and management strategies [8].

64 Among taxa of serious economic and medical importance, mosquitoes are vectors of  
65 numerous human viruses and pathogens representing a major threat for public health  
66 worldwide [9]. Among them, *Aedes aegypti* is of particular importance because of its wide  
67 distribution [10] and its capacity to transmit several major arboviral diseases including Yellow  
68 Fever, Dengue, Zika fever and Chikungunya fever. Although efforts are invested in  
69 developing novel vaccines and strategies to prevent arbovirus transmission, the use of  
70 chemical insecticides remains the cornerstone of arboviral diseases control. However, as for  
71 malaria vectors, decades of chemical treatments have led to the selection and spread of  
72 resistance in this mosquito species. Insecticide resistance is now widespread in *Ae. aegypti*  
73 and affects all insecticide families used in public health [11], often leading to reduced vector  
74 control efficacy [12-14]. Although attempts are made to develop alternative arbovirus control  
75 strategies [15] their large scale implementation will require decades. Until this, characterizing  
76 molecular mechanisms underlying resistance is crucial for tracking down resistance alleles  
77 and improving resistance management strategies [16].

78 Resistance of mosquitoes to chemical insecticides can be the consequence of various  
79 mechanisms, such as non-synonymous mutations affecting the protein targeted by  
80 insecticides, a lower insecticide penetration, its sequestration, or its biodegradation often  
81 called metabolic resistance [6, 17]. In *Ae. aegypti*, resistance to pyrethroids, the main  
82 insecticide family used against mosquitoes, is mainly the consequence of target-site

83 mutations affecting the voltage-gated sodium channel targeted by these insecticides (Knock  
84 Down Resistance '*kdr*' mutations) and metabolic mechanisms [11, 18]. Several *kdr* mutations  
85 have been identified in this species and the causal association between the V410L, S989P,  
86 V1016G/I and F1534C mutations and pyrethroid resistance has been confirmed [19-23].  
87 Most of these mutations can be genotyped on individual mosquitoes by PCR-based assays,  
88 providing essential allele frequency data for resistance management. Conversely, metabolic  
89 resistance is far less understood in *Ae. aegypti* although this type of resistance is frequent  
90 and often accounts for a significant part of the resistance phenotype [6]. Such resistance  
91 mechanism is caused by an increased activity of detoxification enzymes. These  
92 detoxification enzymes include cytochrome P450 monooxygenases (P450s or *CYPs* for  
93 genes), carboxy/cholinesterases (CCEs), glutathione S-transferases (GSTs) and UDP-  
94 glycosyl-transferases (UDPGTs) although other families can be involved [17, 18, 24]. Their  
95 high diversity (~ 300 genes in *Ae. aegypti*) and the complexity of biodegradation pathways  
96 make challenging the identification of those conferring resistance to a specific insecticide.  
97 Theoretically, metabolic resistance can be the consequence of an increased expression of  
98 one or multiple detoxification enzymes metabolizing the insecticide and/or the selection of  
99 variants showing a higher insecticide metabolism rate due to conformational modifications. As  
100 over expression is frequently associated with over transcription, most candidate genes were  
101 identified based on their differential transcription in resistant populations as compared to  
102 susceptible counterparts using transcriptomics [11, 18, 24, 25]. Although these approaches  
103 identified several detoxification enzymes involved in insecticide biodegradation, they mostly  
104 failed to pinpoint the underlying genomic changes, thus impairing the high-throughput  
105 tracking of metabolic resistance alleles in natural populations. The application of powerful  
106 genomic tools has improved the understanding of the genetic bases of metabolic resistance  
107 in *Ae. aegypti*. Using deep targeted DNA sequencing (targeted DNA-seq) Faucon et al. [26]  
108 identified genomic variations associated with resistance to the pyrethroid deltamethrin in  
109 multiple populations sampled from different continents. This study identified several  
110 detoxification enzymes affected by Copy Number Variations (CNV) and non-synonymous  
111 variations in association with insecticide resistance. Cross-comparing these genomic data  
112 with transcriptomic data obtained from RNA-seq confirmed the central role of CNV in the  
113 over-expression of detoxification enzymes associated with resistance in this species [27].  
114 However, this study used natural resistant populations displaying multi-resistance  
115 phenotypes, thus not allowing to properly discriminating between alleles specifically  
116 associated with resistance to the insecticide in question and those associated with resistance  
117 to other insecticides. Furthermore, this approach did not allow breaking up the genetic  
118 linkages between the genomic variations identified, thus potentially leading to false positives.

119 In this context, the present study aimed at better understanding the origin of complex  
120 insecticide resistance phenotypes in the mosquito *Ae. aegypti*. More precisely, we combined  
121 genetic crosses and targeted DNA-seq in an attempt to identify genomic variations  
122 specifically associated with resistance to distinct insecticides in a multi-resistant *Ae. aegypti*  
123 population. After exposure to three insecticides of distinct chemical families (the pyrethroid  
124 deltamethrin, the organophosphate fenitrothion and the carbamate bendiocarb), survivors to  
125 each insecticide were crossed with a susceptible strain to generate three F2 lines. Each F2  
126 line was then phenotyped with two increasing doses of its respective insecticide and  
127 survivors were used to identify CNV and polymorphism variations associated with resistance  
128 in hundreds of target genes including all detoxification enzymes and insecticide target  
129 proteins. In addition, the capture of thousands of intergenic regions regularly distributed over  
130 mosquito genome also allowed crossing up these data with a genome-wide screening of  
131 selection signatures associated with resistance. Overall, this study contributes to improve our  
132 understanding of the complex genomic bases of metabolic resistance to insecticides and  
133 paves the way for the design of novel insecticide resistance tracking tools in this major  
134 arbovirus vector.

135

## 136 **Results**

### 137 **Insecticide resistance levels**

138 The population used in this study consisted in a composite population representative of  
139 multiple natural *Ae. aegypti* populations collected from French Guiana (see methods).  
140 Bioassays performed on the initial composite population (F0 Guy-R) confirmed its high  
141 resistance to the pyrethroid insecticide deltamethrin with resistance ratio ( $RR_{50}$ ) over 316-fold  
142 as compared to the susceptible strain Bora-Bora (Fig. 1A). This population also showed  
143 moderate resistance to the carbamate bendiocarb and the organophosphate fenitrothion with  
144  $RR_{50}$  of 14-fold and 3-fold respectively. As expected, resistance to each insecticide  
145 decreased after crossing F0 survivors to each insecticide with the susceptible strain with F1  
146 resistance ratios decreasing to 25-fold, 7-fold and 2-fold for deltamethrin, bendiocarb and  
147 fenitrothion respectively. Deltamethrin resistance was even lower in F2 (10-fold) while  
148 fenitrothion resistance remains low (1.8-fold) and bendiocarb resistance slightly increased to  
149 10-fold. Assessing the cross resistance of each line to all insecticides confirmed the partial  
150 segregation of resistance alleles after controlled crosses (Fig. 1B). Although F2 individuals  
151 from each line showed a higher survival when exposed to its respective insecticide, this trend  
152 was only significant for deltamethrin in link with the lower resistance to other insecticides.

153

### 154 **Target-site resistance mutations**

155 Assessing *kdr* mutations frequencies from targeted DNA-seq reads data confirmed the high  
156 frequency of the three *kdr* mutations V410L, V1016I and F1534C in F0 Guy-R composite  
157 population corroborating its high deltamethrin resistance level (Fig. 2). Exposing F0 Guy-R  
158 individuals to the LD<sub>80</sub> of each insecticide did not segregate these mutations in survivors. The  
159 segregation of *kdr* mutations became more evident in F2 individuals with higher allele  
160 frequencies observed in F2 individuals of the Delt line surviving to high dose of deltamethrin.  
161 As expected because genetically constrained by two successive mutation events in *Ae.*  
162 *aegypti* [28], the acetylcholinesterase G119S mutation conferring resistance to  
163 organophosphates and carbamates in other species was not detected for DNA-seq reads  
164 data. Validation of *kdr* mutation frequencies on individual mosquitoes by qPCR confirmed the  
165 robustness of allele frequencies estimated from DNA-seq although moderate discrepancies  
166 were observed when the number of genotyped mosquitoes was low (S1 Fig.).

167

### 168 **Gene copy number variations**

169 Over 49.5 % of sequenced reads were successfully mapped to *AaegL5* exome allowing the  
170 detection of 1,317 exonic regions (719 distinct genes) showing a minimum length of 45 bp  
171 and a coverage between 30 and 800 reads/bp in all conditions (median = 94.1 reads/bp).  
172 Filtering genes based on their expected CNV profiles across F0 and F2 conditions in each  
173 line (see methods for filtering conditions) allowed identifying 39 detoxification genes affected  
174 by CNV in association with insecticide resistance (Fig. 3 and S1 Table). Although the  
175 resistance level of the Delt line was high, more CNV were detected in the two other lines  
176 likely due to the contribution of *kdr* mutations in the deltamethrin resistance phenotype. This  
177 trend was also observed for CNV intensity as most genes identified in the Delt line showed a  
178 lower CNV increase in F2 individuals surviving high dose of insecticide as compared to those  
179 identified in the Bend and Feni lines.

180 Among genes affected by CNV, 11 were associated with resistance to multiple insecticides  
181 including the P450s *CYP6P12* and *CYP304B2* and the CCE *AAEL010592* being associated  
182 with resistance to all insecticides. Genes affected by CNV in association with deltamethrin  
183 resistance included 6 P450s, 4 GSTs, 1 alcohol dehydrogenase and 1 CCE. Among them, 2  
184 CYP6 genes belonging to a cluster of P450s in chromosome 1 and 2 CYP9Js belonging to a  
185 large cluster of P450s on chromosome 3 were previously identified as affected by CNV  
186 associated with deltamethrin resistance [26]. Genes affected by CNV in association with  
187 bendiocarb resistance included 15 P450s, 3 GSTs and 2 CCEs. P450s included all genes of  
188 the CYP6 cluster located on chromosome 1 and 4 genes of the large CYP9J cluster located  
189 on chromosome 3 but also several genes from the CYP4, CYP6 and CYP304 families. The  
190 CYP6-like *AAEL009018* located on chromosome 1 was specifically associated with



191 bendiocarb resistance with a marked CNV increase in both F0 and F2 survivors. Genes  
192 affected by CNV in association with fenitrothion resistance included 11 P450s, 3 GSTs, 3  
193 glycosyl-transferases (UDPGTs), 2 CCEs and 1 sulfotransferase. Genes specifically  
194 associated with fenitrothion resistance included the sulfotransferase *AAEL004557* and the  
195 P450 *CYP304B3* on chromosome 1 and the UDPGT *AAEL005468* located at the end of  
196 chromosome 3, but most genes were located at the end of chromosome 2 (*CYP6N17*,  
197 *CYP6Z8*, *CYP6M5*, *GSTX2*, UDPGT *AAEL000687*).

198

### 199 **Selection imprints and polymorphisms**

200 Over 85% of sequenced reads were successfully mapped to *AaegL5* genome allowing the  
201 detection of more than 40,000 variations. Among them, 24,714 were polymorphic across  
202 conditions and passed quality and coverage filters (S2 Table). These variations were mostly  
203 substitutions (96.6%) and were mostly located in targeted regions (70.4 %). The mean  
204 distance between two variations was ~50 kb. Filtering these polymorphisms based on their  
205 expected frequency variations across F0 and F2 conditions in each line (see methods for  
206 filtering conditions) allowed identifying 302 (1.23%) differential polymorphisms associated  
207 with insecticide resistance across all lines. Most of them were line-specific with only three of  
208 them shared between the Feni and Bend lines. Combining allele frequency filtering with a  
209  $F_{ST}$ -based Bayesian approach allowed detecting multiple genomic regions carrying  
210 differential polymorphisms and showing low Q values in both F0 and F2 samples in any line  
211 (Fig. 4 and S3 Table). Most of them were located in proximity of genes potentially involved in  
212 metabolic resistance and included genes carrying non-synonymous variations associated  
213 with resistance (see below). Among these regions, 5 were located on chromosome 1,  
214 including two GST and 1 P450 clusters. The P450 cluster (3 *CYP304* genes at ~287 Mb)  
215 showed a pronounced selection signature for the Delt and Bend lines while the GST cluster  
216 located at ~300 Mb appeared more associated with the Bend line. Several regions were also  
217 detected on chromosome 2. One ABC transporter cluster (4 genes at ~90 Mb), 1  
218 sulfotransferase cluster (2 genes at 134.15 Mb) and 2 CCE clusters (6 genes at ~174 Mb  
219 and 4 genes at ~214 Mb) showed strong selection signature in the Feni line. The large GST  
220 cluster (15 *GSTE* genes at ~351.5 Mb) was associated with both Feni and Delt lines while  
221 the large *CYP6* cluster (16 genes at ~419.2 Mb) showed a strong selection signature in all  
222 lines. Among regions identified in chromosome 3, the 2 large P450 clusters (21 *CYP325*  
223 genes at ~111.6 Mb and 18 *CYP9J* genes at ~368.5 Mb) and the sulfotransferase cluster (6  
224 genes at 396.8 Mb) were detected in all lines. Despite the 81 polymorphisms detected in the  
225 voltage-gated sodium channel gene carrying *kdr* mutations (gene *AAEL023266* ~316 Mb),



226 only a moderate selection signature was detected in this region mainly in the Delt and Bend  
227 lines.

228

229 Among all differential polymorphisms associated with resistance identified, 50 were non-  
230 synonymous (Fig. 5 and S3 Table). Most of them affected detoxification genes located in  
231 genomic regions showing strong selection signatures. All of them were line-specific except  
232 the I324V mutation identified in the alcohol dehydrogenase gene *AAEL026142* found  
233 associated with resistance in both Bend and Feni lines. Seven were associated with  
234 resistance in the Delt line. These affected the alcohol dehydrogenase *AAEL020054* and the  
235 P450 *AAEL001960* in chromosome 2 together with 4 clustered P450s from the CYP325  
236 family and 1 sulfotransferase in chromosome 3. Ten were associated with resistance in the  
237 Bend line affecting 8 distinct genes: 5 on chromosome 1, affecting the alcohol  
238 dehydrogenase *AAEL026142*, the P450s *CYP9AE1* and *CYP329B1*, and *GSTD6*; 2 on  
239 chromosome 2, affecting 2 CYP6 belonging to a large cluster of P450s (*CYP6M9* and  
240 *CYP6N13*); and 3 on chromosome 3, affecting the P450s *CYP4K3* (2 variations) and  
241 *CYP6AG3*. Finally, more than 30 non-synonymous variations were associated with  
242 resistance in the Feni line affecting 21 distinct genes. On chromosome 1, this included the  
243 alcohol dehydrogenase *AAEL026142* and *GSTD1* for which a coding frameshift was  
244 negatively associated with resistance. Multiple isolated genes were affected on chromosome  
245 2, including 1 ABC transporter, a few P450s and 1 UDPGT. Two CCE clusters located within  
246 regions showing strong selection signatures (at ~174 Mb and ~214 Mb) were also affected  
247 with the first cluster being affected by a total of 17 point mutations. Three P450s (*CYP6M11*,  
248 *CYP6Y3* and *CYP6N13*) located within a large CYP6 cluster (at ~419 Mb) were also affected  
249 on chromosome 2. Finally, only the P450 *CYP325T1* and the CCE (*AAEL001517*) were  
250 affected on chromosome 3.

251

## 252 Discussion

253 Natural populations experience a variety of selective pressures often leading to the  
254 expression of complex adaptive phenotypes. In mosquitoes transmitting human diseases, an  
255 over-reliance on chemical control has resulted in the rapid selection and spread of alleles  
256 conferring resistance to various insecticides, often leading to multi-resistance phenotypes [6,  
257 11, 29]. As opposed to target-site mutations which are specific to a given insecticide mode of  
258 action, the complexity and redundancy of insect detoxification systems underlying metabolic  
259 resistance make it less predictable and can lead to the selection of various and multiple  
260 resistance alleles depending on the local context [6, 30]. Most insecticide resistance studies  
261 using field mosquito populations focused on resistance mechanisms to a given insecticide or

262 a given chemical family. However, these kinds of studies did not fully discriminate alleles  
263 associated with resistance to different insecticides, which may lead to false positives. In this  
264 context, the present study attempted at demonstrating that the identification of resistance  
265 alleles can be improved by combining simple genetic crosses and targeted DNA pool  
266 sequencing, while maintaining experimental work and sequencing costs at reasonable levels.

267

## 268 **Using controlled crosses for segregating resistance alleles to different** 269 **insecticides**

270 Bioassays confirmed the high resistance of the F0 Guy-R composite population from French  
271 Guiana to deltamethrin and its moderate resistance to the two other insecticides. As  
272 expected, the introgression of susceptible alleles by controlled crosses strongly reduced  
273 deltamethrin resistance in F2 individuals. This suggests that resistance alleles approaching  
274 fixation in the initial F0 population were less present in F2 individuals, thus facilitating their  
275 dose-response segregation. This was confirmed by the strong decrease of kdr mutations  
276 frequencies observed between F0 and F2 individuals in each line. Cross-resistance patterns  
277 obtained from F2 individuals supported the partial segregation of resistant alleles between  
278 each line. This segregation was also supported by the divergent kdr mutations frequency  
279 patterns observed from F0 to F2 conditions between lines. Nevertheless, an incomplete  
280 segregation of resistance alleles was expected as only two generations of recombination are  
281 likely not enough to break out genetic associations between alleles conferring resistance to  
282 distinct insecticides in all individuals. Such partial segregation may also indicate that  
283 particular genes/alleles are contributing to resistance to multiple insecticides. This was  
284 previously shown in *Anopheles* mosquitoes and *Drosophila melanogaster* where particular  
285 detoxification enzymes have been shown to metabolize multiple insecticides from different  
286 chemical families [31-34].

287

## 288 **Detoxification enzymes CNV associated with resistance**

289 Metabolic resistance is frequently associated with the over-expression of detoxification  
290 enzymes having the ability to degrade and/or sequester insecticides [6, 17]. Although  
291 changes in gene expression can be caused by cis- or trans-mediated transcriptional or post-  
292 transcriptional regulation, CNV may also impact gene expression. Initially associated with  
293 organophosphate resistance in *Culex pipiens* [35], recent genomic studies confirmed the  
294 involvement of CNV in metabolic resistance to various insecticides in mosquitoes [26, 27,  
295 36]. Such key role of CNV in metabolic resistance is not surprising as the locus mutation rate  
296 is far higher for CNV than for mutation [37]. In addition CNV events are favored by the  
297 presence of transposable elements which account for a large part of most mosquito

298 genomes [~50% in *Ae. aegypti* genome, 38]. Furthermore, CNV have a direct impact on  
299 gene expression level (*i.e.* gene dosage effect) without necessarily altering protein function  
300 [39], suggesting that advantageous duplications have moderate costs and can be rapidly  
301 selected in natural populations undertaking strong insecticide pressures. Finally, it has been  
302 shown in yeast that a specific environmental change can stimulate the occurrence of CNV  
303 affecting genes involved in this specific adaptation [40]. Considering that the proposed  
304 transcriptional mechanism depends on promoter activity and that detoxification enzymes are  
305 frequently inducible by insecticides, such mechanisms may have also favored the selection  
306 of CNV-mediated metabolic resistance to insecticides in mosquitoes.

307 Our study identified 39 detoxification genes affected by CNV in association with resistance to  
308 insecticides. Although the F0 Guy-R composite population from French Guiana exhibits a  
309 high resistance to the pyrethroid deltamethrin, only few CNV were found associated with  
310 resistance to this insecticide and most of them did not show a strong dose-response in F2  
311 individuals. Such low CNV signal was likely caused by the presence of *kdr* mutations which  
312 are known to be of significant importance in deltamethrin resistance in *Ae. aegypti* [11, 18,  
313 22]. This was confirmed by the high *kdr* mutations frequencies found in individuals surviving  
314 to high dose of deltamethrin. However, our data also supported the added value of an  
315 increased gene copy number of detoxification enzymes in deltamethrin resistance, especially  
316 in F0 survivors for which *kdr* mutations are nearly fixed. This trend was particularly apparent  
317 for CNV affecting a cluster of 4 CYP6 genes located on chromosome 1 and for a large  
318 cluster of CYP9J genes located on chromosome 3. Indeed the over-expression of P450s  
319 belonging to these two gene clusters was previously associated with pyrethroid resistance in  
320 *Ae. aegypti* [11, 18, 24] and in *Aedes albopictus* [41]. Some of these genes, such as  
321 *CYP6BB2*, *CYP9J28* and *CYP9J32* have been functionally validated as able to metabolize  
322 pyrethroid insecticides [42, 43] and CNV contributing to the over-expression of these P450s  
323 were previously identified in deltamethrin-resistant populations [26, 27]. Finally, the role of  
324 the over-expression of other detoxification enzymes such as GSTs in pyrethroid resistance  
325 has been previously suggested [44-47]. These findings are in accordance with our  
326 identification of CNV affecting the microsomal GST *AAEL006818* and *GSTI1* in association  
327 with deltamethrin resistance.

328 As compared to deltamethrin, more genes were affected by CNV associated with bendiocarb  
329 and fenitrothion resistance. Indeed, even though resistance levels to these two insecticides  
330 were lower, the absence of resistance mutations affecting the target of these insecticides in  
331 *Ae. aegypti* because of genetic constraints [28] may have strengthened the association of  
332 CNV with resistance.

333 Among genes affected by CNV associated with bendiocarb resistance, the CYP6  
334 *AAEL009018* located on chromosome 1 showed a strong and specific dose-response  
335 association with bendiocarb survival in both F0 and F2. The over-transcription of this gene  
336 was previously identified in multi-resistant populations from the Caribbean [48] but also in  
337 Malaysian populations showing cross-resistance between pyrethroids and carbamates [49].  
338 The weak association of this gene with deltamethrin and fenitrothion resistance observed in  
339 our study supports its role in carbamate resistance. Similarly, CNV affecting the CYP6  
340 *AAEL017061* showed a strong and specific association with bendiocarb resistance. The role  
341 of this gene in resistance is supported by the strong association of CNV affecting its *An.*  
342 *gambiae* orthologue *CYP6AA1* with insecticide resistance [50] but also by the capacity of *An.*  
343 *funestus* *CYP6AA1* to metabolize bendiocarb [51].

344 Several CNV affecting various detoxification enzymes were associated with resistance to  
345 fenitrothion. The genes *CYP6N17*, *CYP6Z8* and *CYP6M5*, *GSTX2* and the UDPGT  
346 *AAEL000687* were specifically associated with fenitrothion resistance. Noteworthy,  
347 orthologous P450s, GSTs and UDPGTs were also found highly over-transcribed in a Greek  
348 *Aedes albopictus* strain selected with the organophosphate temephos [52] supporting their  
349 potential contribution to organophosphate resistance. The amplification of a CCE cluster  
350 known to play a key role in temephos resistance [53] was not detected in our study, most  
351 likely because this CCE amplification is not distributed in French Guiana as confirmed by  
352 previous CNV data [26, 27].

353 Overall, the present study supports the contribution of CNV in the over-expression of  
354 detoxification enzymes conferring insecticide resistance in mosquitoes. Although deciphering  
355 their genomic architecture and their spatial dynamics in natural populations would require  
356 further work, these CNV represent promising DNA markers for designing novel high-  
357 throughput molecular assays to track metabolic resistance in the field.

358

## 359 **Selection signatures and non-synonymous variations associated with** 360 **resistance**

361 The combination of allele frequency filtering and  $F_{ST}$ -based selection signature detection  
362 allowed identifying several genomic regions associated with insecticide resistance. These  
363 regions are often located in close proximity to detoxification genes involved in insecticide  
364 metabolism or previously found over-expressed in resistant populations [11, 18], supporting  
365 the robustness of our approach. However, a few regions showing strong selection signatures  
366 were identified near genes rarely associated with resistance in *Ae. aegypti*. This included  
367 multiple P450s from the CYP325, CYP4 and CYP12 families but also GSTs, UDPGTs, ABC-

368 transporters and sulfotransferases, which may all be potentially involved in insecticide  
369 metabolism pathways. Most of these regions are located far from known resistance loci and  
370 included detoxification genes carrying non-synonymous variations associated with  
371 resistance. This suggests they may represent additional resistance loci possibly linked to the  
372 selection of particular detoxification enzyme variants. Indeed, even though most studies on  
373 metabolic resistance focused on the identification of over-expressed detoxification genes, the  
374 selection of particular variants leading to an increased insecticide metabolism rate can also  
375 contribute to the overall resistance phenotype as demonstrated in the malaria vector *An.*  
376 *funestus* [31, 54]. Among genes carrying non-synonymous variations associated with  
377 resistance, the deletion leading to a frame-shift coding in *GSTD1* is of particular interest.  
378 Indeed, as expected if this GST contributes to insecticide metabolism, the functional allele  
379 was specifically associated with resistance to fenitrothion in both F0 and F1 conditions. This  
380 enzyme has been shown to catalyze DDT dechloration and to be expressed in detoxification  
381 tissues in *An. gambiae* [55, 56], supporting its role in insecticide resistance. Also of interest  
382 are the multiple non-synonymous variations associated with fenitrothion resistance affecting  
383 a cluster of CCE genes located at 174 Mb in chromosome 2, of which one (*CCEae3A*,  
384 *AAEL023844*) has been shown to sequester and metabolize the organophosphate temephos  
385 in both *Ae. aegypti* and *Ae. albopictus* [53]. However, previous studies associated temephos  
386 resistance to the over-expression of this CCE gene through increased gene copy number  
387 [26, 57] while no CNV was detected for this gene in the present study. This suggests that the  
388 selection of carboxylesterase variants may also contribute to organophosphate resistance.  
389 This hypothesis is also supported by the previous identification of point mutations in  
390 *CCEae3A* for which docking simulations predicted an impact on temephos binding [57].  
391 Although none of these mutations were found associated with resistance in our study, some  
392 mutations identified in these CCEs are located near the catalytic triad (e.g. I330M in  
393 *CCEae3A* and D332G in *AEL005123*) or the active site (e.g. P293A in *AAEL019678*).  
394 Altogether, the present study allowed identifying multiple detoxification genes located in  
395 genomic regions under selection and carrying non-synonymous mutations associated with  
396 resistance. Although further work is required to validate their association with the phenotype,  
397 the present study paves the way for better understanding their contribution in insecticide  
398 resistance.

399

## 400 **Conclusions**

401 Although insecticide resistance has often been described as a monogenic adaptation in  
402 response to a strong selection pressure, it frequently results from the accumulation of  
403 multiple physiological and metabolic changes often leading to complex phenotypes. Because

404 of their nature, target-site mutations are usually well characterized in mosquitoes and can  
405 typically be genotyped by simple PCR-based molecular assays [11, 18]. In contrast, genomic  
406 changes associated with metabolic resistance are far more difficult to characterize for various  
407 reasons: First, metabolic resistance alleles frequently co-occur with target-site mutations,  
408 thus weakening their association with the overall resistance phenotype. Second, the  
409 complexity and redundancy of insect detoxification pathways can lead to the selection of  
410 multiple and diverse alleles through local adaptation. Third, increased insecticide metabolism  
411 can be the consequence of multiple and additive genetic changes including non-synonymous  
412 polymorphisms causing structural changes of detoxification enzymes but also up-regulation  
413 and increased gene copy number, both enhancing their expression. Although massive  
414 parallel sequencing appears as a powerful tool for untangling the complexity of the genetic  
415 bases of metabolic resistance, its association with a well-thought experimental design can  
416 help reducing both false negatives and false positives. Here, we demonstrated that  
417 combining simple genetic crosses with pool targeted DNA-seq can enhance resistance allele  
418 segregation and produce high coverage sequence data for identifying metabolic resistance  
419 alleles while maintaining experimental work and costs at an acceptable level. Our results  
420 also suggest that eliminating the effect of target-site mutations by controlled crosses or gene  
421 editing should improve the power of genotype-phenotype association studies targeting  
422 metabolic resistance alleles. Considering the global threat of insecticide resistance on vector  
423 control and the decades that will be necessary for the full deployment of insecticide-free  
424 strategies, untangling the genetic bases of insecticide resistance still represents a challenge  
425 for controlling vector-borne diseases.

426

## 427 **Materials and methods**

### 428 **Ethics statement**

429 Blood feeding of adult mosquitoes was performed on mice. Mice were maintained in the  
430 animal house of the federative structure Environmental and Systems Biology (BEeSy) of  
431 Grenoble-Alpes University agreed by the French Ministry of animal welfare (agreement n° B  
432 38 421 10 001) and used in accordance to European Union laws (directive 2010/63/UE). The  
433 use of animals for this study was approved by the ethic committee ComEth Grenoble-C2EA-  
434 12 mandated by the French Ministry of higher Education and Research (MENESR).

### 435 **Mosquitoes**

436 The multi-resistant composite *Ae. aegypti* population from French Guiana used in this study  
437 consisted in a pool of 6 natural populations collected in 2016 in the following localities:



438 Cayenne (North-East), Sinnamary (North-East), Saint-Laurent du Maroni (North), Apatou  
439 (North-West), Maripasoula (West) and Saint-Georges (East). Each population was collected  
440 as larvae from up to 5 breeding sites located within a 5 km range. These populations were  
441 separately raised to the adult stage and blood fed to generate adults of the next generation.  
442 The composite population was then created by pooling 1000 virgin adults of both sexes from  
443 each population and breeding them together for 3 generations without insecticide selection in  
444 order to homogenize genetic backgrounds. The resulting composite population (F0 Guy-R)  
445 was used for controlled crosses.

446

### 447 **Controlled crosses**

448 Batches of virgin F0 Guy-R females were exposed to a dose killing 80% of individuals ( $LD_{80}$ )  
449 of 3 insecticides belonging to distinct chemical families: the pyrethroid deltamethrin, the  
450 organophosphate fenitrothion and the carbamate bendiocarb (same exposure conditions as  
451 for bioassays, see below). Females surviving to each insecticide were then crossed with the  
452 fully susceptible strain Bora-Bora (Susc) in order to create three distinct lines (Fig. 6). For  
453 each line, controlled crosses were repeated twice and consisted in mass-crossing 100 virgin  
454 females having survived insecticide exposure (F0-Delt $_{LD80}$ , F0-Bend $_{LD80}$ , F0-Feni $_{LD80}$ ) with an  
455 equal number of virgin males from the susceptible strain. For each line, F1 individuals were  
456 allowed to reproduce freely and blood fed in order to generate F2 individuals. F2 individuals  
457 from each line were then segregated based on their resistance phenotype by exposing 3  
458 days-old females to two increasing doses of their respective insecticide ( $LD_{25}$  and  $LD_{75}$ ). F0  
459 and F2 individuals from each line, unexposed and surviving to insecticides, were used for  
460 molecular analyses (Fig. 6).

461

### 462 **Bioassays**

463 All bioassays were performed on 3 days-old non blood fed females using WHO tests tubes  
464 equipped with insecticide-impregnated filter papers following WHO guidelines [58]. First,  
465 dose-response bioassays with deltamethrin, fenitrothion and bendiocarb were performed on  
466 the F0 Guy-R composite population to assess its resistance phenotype and identify the  $LD_{80}$   
467 of each insecticide to be used for the initial F<sub>0</sub> segregation. These bioassays were conducted  
468 with at least five doses of deltamethrin (0.05 % to 1%), fenitrothion (0.0125% to 0.4%) and  
469 bendiocarb (0.2 to 2%) and an exposure time of 60 min. At least five batches of 20  
470 mosquitoes were used for each insecticide dose. Mortality data were recorded after a 24h  
471 recovery time and submitted to a probit analysis using the XL-Stat Excel module (Addinsoft,  
472 France) for estimating LD values. Resistance ratios ( $RR_{50}$ ) to each insecticide were



473 computed from LD<sub>50</sub> values obtained for each line as compared to the susceptible strain.  
474 Resistance levels of F1 and F2 individuals from each line were obtained following the same  
475 procedure.  
476 Cross-resistance profiles of F2 individuals from each line to all insecticides were then  
477 evaluated using single-dose bioassays. For each insecticide, the dose was calibrated in  
478 order to obtain a mortality ranging from 20% to 40% in the corresponding F2 line. Doses  
479 used were as follows: deltamethrin 0.05% for 60 min, bendiocarb 0.5% for 60 min,  
480 fenitrothion 0.1% for 45 min. At least 4 batches of 20 three days-old non blood fed females  
481 were used per line and insecticide. Mortality was recorded after a 24h recovery time and data  
482 were expressed as mean % mortality ± SD. Resistance levels to each insecticide were  
483 compared across lines using a generalized linear mixt model (binomial family) using R  
484 version 3.5.2 (R Core development Team).

485

## 486 **Deep targeted DNA-sequencing**

487 **Sample preparation.** Deep targeted DNA pool sequencing was used to search for genomic  
488 variations associated with insecticide resistance in each line. Genomic DNA was extracted  
489 from 2 batches of 50 adult females from each condition (F0 GuyR, F0<sub>LD80</sub>, F2<sub>LD25</sub> and F2<sub>LD75</sub>,  
490 see Fig. 6) using the PureGene kit (Qiagen) following manufacturer's instructions. DNA  
491 extracts obtained from each batch were quality-checked on agarose gel, quantified using the  
492 Qubit dsDNA Broad Range kit (Qiagen) and mixed in equal quantity in order to obtain a  
493 single genomic DNA extract representative of 100 individuals for each condition.

494 **Capture libraries preparation and sequencing.** The capture of genomic regions of interest  
495 was based on the SureSelect® target enrichment system (Agilent Technologies). Capture  
496 library was designed based on Aaeg L3 genome assembly and Aaeg L3.3 annotation and  
497 consisted in 54,538 overlapping RNA probes of 120 bp. Among them, 32,494 probes  
498 targeted the exons and 1.5 kb upstream regions of 336 candidate genes with a mean  
499 coverage of 4X. The remaining 22,044 probes targeted 7,348 unique 220 bp intergenic  
500 regions equally spread over *Ae. aegypti* genome. Candidate genes included all known  
501 detoxification enzymes (cytochrome P450s, glutathione S-transferases, carboxylesterases,  
502 UDP-glycosyltransferases) together with other enzymes potentially involved in insecticide  
503 biodegradation pathways and insecticide target proteins. Intergenic regions were defined in  
504 order to cover > 95% of *Ae. aegypti* genome using the following criteria: target region size =  
505 220 bp; optimal distance between 2 regions = 150 kb ± 10 kb; region distance to any  
506 annotated gene > 5 kb; avoid repeated and redundant regions; avoid regions with GC  
507 richness > 70% or single nucleotide richness > 50%; avoid regions with undefined

508 nucleotides (N); do not consider supercontigs < 150 kb; avoid regions located within 75.5 kb  
509 of supercontig boundaries. All genomic regions targeted by the study are detailed in S4  
510 Table. Capture was performed with the SureSelect<sup>XT</sup> Reagent kit (Agilent Technologies)  
511 following the 'SureSelect<sup>XT</sup> Target Enrichment System for Illumina Paired-end Sequencing  
512 Library' protocol vB.4. Briefly, 3 µg of genomic DNA from each sample were fragmented  
513 using a Bioruptor (Diagenode), purified, ligated to adaptors and amplified by PCR using  
514 Herculase II DNA polymerase (Agilent Technologies). After QC of library size and quantity,  
515 libraries were hybridized to biotinylated baits and purified using Dynal MyOne streptavidin  
516 beads (Invitrogene). Captured DNA fragments were amplified, purified and multiplexed  
517 before sequencing. Sequencing was performed on an Illumina NextSeq500 and generated  
518 more than 300 million 75 bp paired reads with an average of 23.3 million reads per sample.  
519 Reads were assigned to each sample (unplexing) and adaptors were removed. Reads  
520 quality was checked for each sample using FastQC  
521 (<http://www.bioinformatics.babraham.ac.uk/projects/fastqc>) and reads were loaded into  
522 Strand NGS v3.1.1 (Strand Life Science) for further analyses.

523 **Reads mapping and filtering.** In order to minimize false positives arising from mapping bias  
524 in high-redundancy and low complexity regions, CNV were only identified from coding  
525 regions. Reads were mapped against all Aaeg L5 exons using a padding of 35 bp and the  
526 following parameters: minimum 90% identity, maximum 5% gap, mean insert size of 167 ±  
527 30 bp, mismatch penalty = 4, gap opening penalty = 6, gap extension penalty = 1, clipping  
528 penalty = 5, min align read length = 30, ignore reads with more than 5 matches, trim 3' end if  
529 base quality < 25. Reads were then filtered on their quality metrics and mapping quality using  
530 the following criteria: mean read quality ≥ 28, N allowed ≤ 2, alignment score ≥ 90, Mapping  
531 quality ≥ 40, read length ≥ 35, remove non primary multiply mapped reads, remove inter-  
532 chromosomal split reads. Finally, mate missing, translocated and duplicated reads were  
533 removed. For polymorphisms analysis, reads were mapped against the whole Aaeg L5  
534 genome in order to consider both genic and intergenic target regions and maximize genome  
535 coverage for the detection of selection signatures. The same mapping and filtering  
536 parameters as for CNV were applied.

537 **CNV detection.** The coverage of all exonic regions was computed and only regions showing  
538 a mean coverage between 30 and 800 reads/bp in all samples and a length > 45 bp were  
539 retained. For all remaining regions, the normalized coverage was used for computing a  
540 relative copy number variation in each sample as compared to a common reference obtained  
541 from all samples. Relative copy number values were averaged per gene and centering and  
542 dimensionality reduction was applied to minimize stochastic variation. For each line, genes  
543 were considered affected by CNV associated with insecticide resistance if their CNV profile

544 satisfied the following conditions:  $CNV(F0_{LD80} - F0) > 0.3$  AND  $CNV(F0_{LD80} - F2) > 0$  AND  
545  $[CNV(F2_{LD25} - F2) > 0.2$  OR  $CNV(F2_{LD75} - F2) > 0.2]$ . Basically, CNV associated with resistance  
546 were expected to increase from F0 to F0 survivors, decrease from F0 survivors to F2 after  
547 crossing with the susceptible strain, and increase in F2 survivors. No dose response  
548 condition was applied for CNV in order to minimize the confounding effect of target site  
549 mutations.

550 **Polymorphisms and selection signatures.** Variants were call against the whole Aaeg L5  
551 genome using the following parameters: coverage > 30 in all conditions, confidence score cut  
552 off = 100, ignore loci with homopolymer stretch > 4, ignore loci with average base quality  $\leq$   
553 15, ignore loci with strand bias  $\geq 50$  and coverage  $\geq 50$ , ignore reads with mapping quality  $\leq$   
554 20, ignore variants with less than 4% supporting reads. Among all variants called only those  
555 polymorphic among our conditions (*i.e.* showing  $\geq 5\%$  variation in at least two conditions)  
556 were retained and their genic effects were computed.

557 Associations between polymorphisms and resistance to each insecticide were assessed by  
558 combining an allele frequency filtering approach with an  $F_{ST}$ -based approach.

559 The frequency filtering approach was based on the expected resistance allele frequency  
560 variations across conditions taking into account their initial frequency. Frequency thresholds  
561 used are described in detail in Table 1. Basically, the frequency of alleles positively  
562 associated with resistance was expected to increase from unexposed F0 individuals to F0  
563 survivors, decrease from F0 survivors to unexposed F2 individuals (following crossing with  
564 the susceptible strain), and increase again in F2 survivors in association with the insecticide  
565 dose. Different initial allele frequency thresholds were used for identifying alleles associated  
566 with deltamethrin ( $\geq 30\%$  in F0 Guy-R) and those associated with bendiocarb and fenitrothion  
567 resistance ( $\geq 15\%$  in F0 Guy-R) to account for the higher deltamethrin resistance level of the  
568 initial composite population. The frequency of deleterious alleles (*i.e.* those negatively  
569 associated with resistance) was expected to behave reciprocally.

570 The  $F_{ST}$ -based approach aimed at assessing departure from neutrality using the Bayesian  
571 method implemented in BayeScan version 2.1 [59]. Because substitutions and deletions may  
572 have different probability of occurrence, only substitutions were considered for this analysis.  
573 For each insecticide line, 2 analyses were run separately. The first one contrasted allele  
574 frequencies in F0 samples (unexposed and insecticide survivors: F0 Guy-R and F0<sub>LD80</sub>) and  
575 the second one in F2 samples (unexposed and survivors to each insecticide dose: F2,  
576 F2<sub>LD25</sub>, F2<sub>LD75</sub>). The Markov chain Monte Carlo (MCMC) algorithm was run with prior odds of  
577 10. The proposal distributions for parameters were adjusted by running 20 short pilot runs of  
578 2,000 iterations. A burn-in period of 100,000 iterations was used and the posterior

579 probabilities were estimated from the following 500,000 iterations (10,000 iterations samples  
 580 every 50). Genomic regions showing low Bayscan Q-values in both F0 and F2 comparisons  
 581 and including differential polymorphisms identified from the frequency filtering approach were  
 582 considered as under selection in association with insecticide resistance.

583

584 **Table 1.** Conditions used for identifying polymorphisms associated with resistance

| Line <sup>2</sup> | Initial allele frequency (%) <sup>1</sup> | Minimum allele frequency variation <sup>1</sup> |                          |                          |                                          |                          |
|-------------------|-------------------------------------------|-------------------------------------------------|--------------------------|--------------------------|------------------------------------------|--------------------------|
|                   |                                           | F0 to F0 <sub>LD80</sub>                        | F0 <sub>LD80</sub> to F2 | F2 to F2 <sub>LD25</sub> | F2 <sub>LD25</sub> to F2 <sub>LD75</sub> | F2 to F2 <sub>LD75</sub> |
| Delt              | 30 to 85                                  | + 15 %                                          |                          |                          |                                          |                          |
|                   | 85 to 90                                  | + 10 %                                          |                          |                          |                                          |                          |
|                   | 90 to 95                                  | + 5 %                                           |                          |                          |                                          |                          |
|                   | > 95                                      | increase                                        | decrease                 | increase                 | increase                                 | + 15 %                   |
| Bend              | 15 to 85                                  | + 15 %                                          |                          |                          |                                          |                          |
|                   | 85 to 90                                  | + 10 %                                          |                          |                          |                                          |                          |
|                   | 90 to 95                                  | + 5 %                                           |                          |                          |                                          |                          |
|                   | > 95                                      | increase                                        |                          |                          |                                          |                          |

<sup>1</sup> Reciprocal conditions were used for deleterious alleles.

<sup>2</sup> different initial allele frequency threshold were chosen for Bend and Feni lines to account for the lower resistance of the initial F0 Guy-R population to these two insecticides.

585

### 586 **Kdr mutations genotyping**

587 Allelic frequencies for the three kdr mutations (V410L, V1016I and F1534C) initially present  
 588 in the F0 Guy-R composite population were obtained from F0 and F2 samples of each line  
 589 based on reads data. In order to validate allele frequencies obtained from targeted pool  
 590 DNA-seq, the two kdr mutations V1016I and F1534C were genotyped on individual  
 591 mosquitoes from the initial F0 Guy-R population (F0) together with F0 and F2 samples of the  
 592 Delt line. Total genomic DNA was extracted using cetyl trimethyl ammonium bromide  
 593 chloroform/isoamyl alcohol from 30 non blood fed females per condition as described in [60].  
 594 Individual genotypes for each kdr mutations were obtained by qPCR high resolution melt  
 595 curve analysis using 0.15 ng of genomic DNA per reaction as described in [20].

596

## 597 **Data availability statement**

598 The sequence data from this study have been deposited to the European Nucleotide Archive  
599 (ENA; <http://www.ebi.ac.uk/ena>) under the accession number PRJEB30945.

600

## 601 **Acknowledgments**

602 We thank Dr. Tristan Cumer, Dr. Frederic Boyer, Prof. Laurence Despres for critical  
603 comments on the manuscript.

604

## 605 **Financial Disclosure Statement**

606 This work was supported by fundings from the Laboratoire d'Ecologie Alpine (LECA) and the  
607 European Union's Horizon 2020 Research and Innovation Programme under  
608 ZIKAlliance Grant Agreement no .734548. Dr. Frédéric Faucon was supported by a PhD  
609 fellowship obtained from the Grenoble-Alpes University. The funders had no role in study  
610 design, data collection and analysis, decision to publish, or preparation of the manuscript.

611

## 612 **Author contributions**

613 Conceived and designed the experiment: JPD. Performed experiments: FF, BL, MM, LG, TG,  
614 FL, SR. Analyzed the data: JC, FF, BL, SS, SR, JPD. Collected biological material: FF, ID.  
615 Wrote the manuscript: JC, JPD.

616

## 617 **References**

- 618 **1.** Orr HA. The genetic theory of adaptation: a brief history. *Nat Rev Genet.*  
619 2005;6(2):119-27. doi: 10.1038/nrg1523.
- 620 **2.** Palumbi SR. Humans as the world's greatest evolutionary force. *Science.*  
621 2001;293(5536):1786-90. doi: 10.1126/science.293.5536.1786.
- 622 **3.** Hendry AP, Farrugia TJ, Kinnison MT. Human influences on rates of phenotypic  
623 change in wild animal populations. *Mol Ecol.* 2008;17(1):20-9. doi: 10.1111/j.1365-  
624 294X.2007.03428.x.
- 625 **4.** Hendry AP, Gotanda KM, Svensson EI. Human influences on evolution, and the  
626 ecological and societal consequences. *Philos Trans R Soc Lond B Biol Sci.* 2017;372(1712).  
627 doi: 10.1098/rstb.2016.0028.
- 628 **5.** Georghiou GP. Overview of insecticide resistance. In: Le Baron HM, Moberg WK,  
629 editors. *Managing Resistance to Agrochemicals: ACS symposium series*; 1990. p. 18-41.

- 630 **6.** Li XC, Schuler MA, Berenbaum MR. Molecular mechanisms of metabolic resistance  
631 to synthetic and natural xenobiotics. *Annu Rev Entomol.* 2007;52:231-53. doi:  
632 10.1146/annurev.ento.51.110104.151104.
- 633 **7.** Ffrench-Constant RH, Daborn PJ, Le Goff G. The genetics and genomics of  
634 insecticide resistance. *Trends Genet.* 2004;20(3):163-70. doi: 10.1016/j.tig.2004.01.003.
- 635 **8.** Hawkins NJ, Bass C, Dixon A, Neve P. The evolutionary origins of pesticide  
636 resistance. *Biological reviews of the Cambridge Philosophical Society.* 2018. doi:  
637 10.1111/brv.12440.
- 638 **9.** Lounibos LP. Invasions by insect vectors of human disease. *Annu Rev Entomol.*  
639 2002;47:233-66. doi: 10.1146/annurev.ento.47.091201.145206.
- 640 **10.** Brown JE, Evans BR, Zheng W, Obas V, Barrera-Martinez L, Egizi A, et al. Human  
641 impacts have shaped historical and recent evolution in *Aedes aegypti*, the dengue and yellow  
642 fever mosquito. *Evolution.* 2014;68(2):514-25. doi: 10.1111/evo.12281.
- 643 **11.** Moyes CL, Vontas J, Martins AJ, Ng LC, Koou SY, Dusfour I, et al. Contemporary  
644 status of insecticide resistance in the major *Aedes* vectors of arboviruses infecting humans.  
645 *PLoS Negl Trop Dis.* 2017;11(7):e0005625. doi: 10.1371/journal.pntd.0005625.
- 646 **12.** Marcombe S, Carron A, Darriet F, Etienne M, Agnew P, Tolosa M, et al. Reduced  
647 efficacy of pyrethroid space sprays for dengue control in an area of Martinique with  
648 pyrethroid resistance. *Am J Trop Med Hyg.* 2009;80(5):745-51.
- 649 **13.** Dusfour I, Thalmensy V, Gaborit P, Issaly J, Carinci R, Girod R. Multiple insecticide  
650 resistance in *Aedes aegypti* (Diptera: Culicidae) populations compromises the effectiveness  
651 of dengue vector control in French Guiana. *Mem Inst Oswaldo Cruz.* 2011;106(3):346-52.
- 652 **14.** Marcombe S, Darriet F, Tolosa M, Agnew P, Duchon S, Etienne M, et al. Pyrethroid  
653 resistance reduces the efficacy of space sprays for dengue control on the island of  
654 Martinique (Caribbean). *PLoS Negl Trop Dis.* 2011;5(6):e1202. doi:  
655 10.1371/journal.pntd.0001202.
- 656 **15.** Achee NL, Grieco JP, Vatandoost H, Seixas G, Pinto J, Ching-Ng L, et al. Alternative  
657 strategies for mosquito-borne arbovirus control. *PLoS Negl Trop Dis.* 2019;13(1):e0006822.  
658 doi: 10.1371/journal.pntd.0006822.
- 659 **16.** Dusfour I, Vontas J, David JP, Weetman D, Fonseca DM, Raghavendra K, et al.  
660 Management of insecticide resistance in the major *Aedes* vectors of arboviruses: advances  
661 and challenges. *Plos Neg Trop Dis.* 2018. *in press*.
- 662 **17.** Hemingway J, Hawkes NJ, McCarroll L, Ranson H. The molecular basis of insecticide  
663 resistance in mosquitoes. *Insect Biochem Mol Biol.* 2004;34(7):653-65. doi:  
664 10.1016/j.ibmb.2004.03.018.
- 665 **18.** Smith LB, Kasai S, Scott JG. Pyrethroid resistance in *Aedes aegypti* and *Aedes*  
666 *albopictus*: Important mosquito vectors of human diseases. *Pestic Biochem Physiol.*  
667 2016;133:1-12. doi: 10.1016/j.pestbp.2016.03.005.
- 668 **19.** Brengues C, Hawkes NJ, Chandre F, McCarroll L, Duchon S, Guillet P, et al.  
669 Pyrethroid and DDT cross-resistance in *Aedes aegypti* is correlated with novel mutations in  
670 the voltage-gated sodium channel gene. *Med Vet Entomol.* 2003;17(1):87-94.



- 671 **20.** Saavedra-Rodriguez K, Urdaneta-Marquez L, Rajatileka S, Moulton M, Flores AE,  
672 Fernandez-Salas I, et al. A mutation in the voltage-gated sodium channel gene associated  
673 with pyrethroid resistance in Latin American *Aedes aegypti*. *Insect Mol Biol.* 2007;16(6):785-  
674 98.
- 675 **21.** Yanola J, Somboon P, Walton C, Nachaiwieng W, Somwang P, Prapanthadara LA.  
676 High-throughput assays for detection of the F1534C mutation in the voltage-gated sodium  
677 channel gene in permethrin-resistant *Aedes aegypti* and the distribution of this mutation  
678 throughout Thailand. *Trop Med Int Health.* 2011;16(4):501-9. doi: 10.1111/j.1365-  
679 3156.2011.02725.x.
- 680 **22.** Haddi K, Tome HVV, Du Y, Valbon WR, Nomura Y, Martins GF, et al. Detection of a  
681 new pyrethroid resistance mutation (V410L) in the sodium channel of *Aedes aegypti*: a  
682 potential challenge for mosquito control. *Sci Rep.* 2017;7:46549. doi: 10.1038/srep46549.
- 683 **23.** Hirata K, Komagata O, Itokawa K, Yamamoto A, Tomita T, Kasai S. A single  
684 crossing-over event in voltage-sensitive Na<sup>+</sup> channel genes may cause critical failure of  
685 dengue mosquito control by insecticides. *PLoS Negl Trop Dis.* 2014;8(8):e3085. doi:  
686 10.1371/journal.pntd.0003085.
- 687 **24.** David JP, Ismail HM, Chandor-Proust A, Paine MJ. Role of cytochrome P450s in  
688 insecticide resistance: impact on the control of mosquito-borne diseases and use of  
689 insecticides on Earth. *Phil Trans Roy Soc B.* 2013;368(1612):20120429. doi:  
690 10.1098/rstb.2012.0429.
- 691 **25.** Vontas J, Kioulos E, Pavlidi N, Morou E, Torre AD, Ranson H. Insecticide resistance  
692 in the major dengue vectors *Aedes albopictus* and *Aedes aegypti*. *Pestic Biochem Physiol.*  
693 2012;104(2):126–31. doi: 10.1016/j.pestbp.2012.05.008.
- 694 **26.** Faucon F, Dusfour I, Gaude T, Navratil V, Boyer F, Chandre F, et al. Identifying  
695 genomic changes associated with insecticide resistance in the dengue mosquito *Aedes*  
696 *aegypti* by deep targeted sequencing. *Genome Res.* 2015;25(9):1347-59. doi:  
697 10.1101/gr.189225.115.
- 698 **27.** Faucon F, Gaude T, Dusfour I, Navratil V, Corbel V, Juntarajumnong W, et al. In the  
699 hunt for genomic markers of metabolic resistance to pyrethroids in the mosquito *Aedes*  
700 *aegypti*: An integrated next-generation sequencing approach. *PLoS Negl Trop Dis.*  
701 2017;11(4):e0005526. doi: 10.1371/journal.pntd.0005526.
- 702 **28.** Weill M, Berthomieu A, Berticat C, Lutfalla G, Negre V, Pasteur N, et al. Insecticide  
703 resistance: a silent base prediction. *Curr Biol.* 2004;14(14):R552-3. doi:  
704 10.1016/j.cub.2004.07.008.
- 705 **29.** Ranson H, Abdallah H, Badolo A, Guelbeogo WM, Kera-Hinzoumbe C, Yangalbe-  
706 Kalnane E, et al. Insecticide resistance in *Anopheles gambiae*: data from the first year of a  
707 multi-country study highlight the extent of the problem. *Malaria J.* 2009;8:299. doi:  
708 10.1186/1475-2875-8-299.
- 709 **30.** Feyereisen R. Insect cytochrome P450. In: Gilbert LI, Iatrou K, Gill S, editors.  
710 *Comprehensive Molecular Insect Science*: Elsevier; 2005. p. 1-77.
- 711 **31.** Riveron JM, Yunta C, Ibrahim SS, Djouaka R, Irving H, Menze BD, et al. A single  
712 mutation in the GSTe2 gene allows tracking of metabolically-based insecticide resistance in  
713 a major malaria vector. *Gen Biol.* 2014;15(2):R27. doi: 10.1186/gb-2014-15-2-r27.



- 714 **32.** Mitchell SN, Stevenson BJ, Muller P, Wilding CS, Egyir-Yawson A, Field SG, et al.  
715 Identification and validation of a gene causing cross-resistance between insecticide classes  
716 in *Anopheles gambiae* from Ghana. Proc Natl Acad Sci U S A. 2012;109(16):6147-52. doi:  
717 10.1073/pnas.1203452109.
- 718 **33.** Edi CV, Djogbenou L, Jenkins AM, Regna K, Muskavitch MA, Poupardin R, et al.  
719 CYP6 P450 enzymes and ACE-1 duplication produce extreme and multiple insecticide  
720 resistance in the malaria mosquito *Anopheles gambiae*. Plos Genet. 2014;10(3):e1004236.  
721 doi: 10.1371/journal.pgen.1004236.
- 722 **34.** Daborn PJ, Lumb C, Boey A, Wong W, Ffrench-Constant RH, Batterham P.  
723 Evaluating the insecticide resistance potential of eight *Drosophila melanogaster* cytochrome  
724 P450 genes by transgenic over-expression. Insect Biochem Mol Biol. 2007;37(5):512-9. doi:  
725 10.1016/j.ibmb.2007.02.008.
- 726 **35.** Raymond M, Chevillon C, Guillemaud T, Lenormand T, Pasteur N. An overview of the  
727 evolution of overproduced esterases in the mosquito *Culex pipiens*. Philos Trans R Soc Lond  
728 B Biol Sci. 1998;353(1376):1707-11. doi: 10.1098/rstb.1998.0322.
- 729 **36.** Weetman D, Djogbenou LS, Lucas E. Copy number variation (CNV) and insecticide  
730 resistance in mosquitoes: evolving knowledge or an evolving problem? Current opinion in  
731 insect science. 2018;27:82-8. doi: 10.1016/j.cois.2018.04.005.
- 732 **37.** Campbell CD, Eichler EE. Properties and rates of germline mutations in humans.  
733 Trends Genet. 2013;29(10):575-84. doi: 10.1016/j.tig.2013.04.005.
- 734 **38.** Nene V, Wortman JR, Lawson D, Haas B, Kodira C, Tu ZJ, et al. Genome sequence  
735 of *Aedes aegypti*, a major arbovirus vector. Science. 2007;316(5832):1718-23. doi:  
736 10.1126/science.1138878.
- 737 **39.** Gamazon ER, Stranger BE. The impact of human copy number variation on gene  
738 expression. Briefings in functional genomics. 2015;14(5):352-7. doi: 10.1093/bfgp/elv017.
- 739 **40.** Hull RM, Cruz C, Jack CV, Houseley J. Environmental change drives accelerated  
740 adaptation through stimulated copy number variation. PLoS Biol. 2017;15(6):e2001333. doi:  
741 10.1371/journal.pbio.2001333.
- 742 **41.** Ishak IH, Riveron JM, Ibrahim SS, Stott R, Longbottom J, Irving H, et al. The  
743 Cytochrome P450 gene CYP6P12 confers pyrethroid resistance in *kdr*-free Malaysian  
744 populations of the dengue vector *Aedes albopictus*. Sci Rep. 2016;6:24707. doi:  
745 10.1038/srep24707.
- 746 **42.** Kasai S, Komagata O, Itokawa K, Shono T, Ng LC, Kobayashi M, et al. Mechanisms  
747 of pyrethroid resistance in the dengue mosquito vector, *Aedes aegypti*: target site  
748 insensitivity, penetration, and metabolism. PLoS Negl Trop Dis. 2014;8(6):e2948. doi:  
749 10.1371/journal.pntd.0002948.
- 750 **43.** Stevenson BJ, Pignatelli P, Nikou D, Paine MJ. Pinpointing P450s associated with  
751 pyrethroid metabolism in the dengue vector, *Aedes aegypti*: developing new tools to combat  
752 insecticide resistance. PLoS Negl Trop Dis. 2012;6(3):e1595. doi:  
753 10.1371/journal.pntd.0001595.
- 754 **44.** David JP, Strode C, Vontas J, Nikou D, Vaughan A, Pignatelli PM, et al. The  
755 *Anopheles gambiae* detoxification chip: A highly specific microarray to study metabolic-based

- 756 insecticide resistance in malaria vectors. Proc Natl Acad Sci USA. 2005;102(11):4080-4. doi:  
757 10.1073/pnas.0409348102.
- 758 **45.** Kostaropoulos I, Papadopoulos AI, Metaxakis A, Boukouvala E, Papadopoulou-  
759 Mourkidou E. Glutathione S-transferase in the defence against pyrethroids in insects. Insect  
760 Biochem Mol Biol. 2001;31(4-5):313-9.
- 761 **46.** Vontas JG, Small GJ, Hemingway J. Glutathione S-transferases as antioxidant  
762 defence agents confer pyrethroid resistance in *Nilaparvata lugens*. Biochem J. 2001;357(Pt  
763 1):65-72.
- 764 **47.** Lumjuan N, Rajatileka S, Changsom D, Wicheer J, Leelapat P, Prapanthadara LA, et  
765 al. The role of the *Aedes aegypti* epsilon glutathione transferases in conferring resistance to  
766 DDT and pyrethroid insecticides. Insect Biochem Mol Biol. 2011;41(3):203-9. doi:  
767 10.1016/j.ibmb.2010.12.005.
- 768 **48.** Bariami V, Jones CM, Poupardin R, Vontas J, Ranson H. Gene Amplification, ABC  
769 Transporters and Cytochrome P450s: Unraveling the Molecular Basis of Pyrethroid  
770 Resistance in the Dengue Vector, *Aedes aegypti*. PLoS Negl Trop Dis. 2012;6(6). doi:  
771 10.1371/journal.pntd.0001692.
- 772 **49.** Ishak IH, Kamgang B, Ibrahim SS, Riveron JM, Irving H, Wondji CS. Pyrethroid  
773 Resistance in Malaysian Populations of Dengue Vector *Aedes aegypti* Is Mediated by CYP9  
774 Family of Cytochrome P450 Genes. PLoS Negl Trop Dis. 2017;11(1):e0005302. doi:  
775 10.1371/journal.pntd.0005302.
- 776 **50.** Lucas ER, Miles A, Harding NJ, Clarkson CS, Lawniczak MK, Kwiatkowski DP, et al.  
777 Whole genome sequencing reveals high complexity of copy number variation at insecticide  
778 resistance loci in malaria mosquitoes. BioRxiv. 2018. <http://dx.doi.org/10.1101/39956>.
- 779 **51.** Ibrahim SS, Amvongo-Adjia N, Wondji MJ, Irving H, Riveron JM, Wondji CS.  
780 Pyrethroid Resistance in the Major Malaria Vector *Anopheles funestus* is Exacerbated by  
781 Overexpression and Overactivity of the P450 CYP6AA1 Across Africa. Genes. 2018;9(3).  
782 doi: 10.3390/genes9030140.
- 783 **52.** Grigoraki L, Lagnel J, Kioulos I, Kampouraki A, Morou E, Labbe P, et al.  
784 Transcriptome Profiling and Genetic Study Reveal Amplified Carboxylesterase Genes  
785 Implicated in Temephos Resistance, in the Asian Tiger Mosquito *Aedes albopictus*. PLoS  
786 Negl Trop Dis. 2015;9(5):e0003771. doi: 10.1371/journal.pntd.0003771.
- 787 **53.** Grigoraki L, Balabanidou V, Meristoudis C, Myridakis A, Ranson H, Swevers L, et al.  
788 Functional and immunohistochemical characterization of CCEae3a, a carboxylesterase  
789 associated with temephos resistance in the major arbovirus vectors *Aedes aegypti* and *Ae.*  
790 *albopictus*. Insect Biochem Mol Biol. 2016;74:61-7. doi: 10.1016/j.ibmb.2016.05.007.
- 791 **54.** Ibrahim SS, Riveron JM, Bibby J, Irving H, Yunta C, Paine MJ, et al. Allelic Variation  
792 of Cytochrome P450s Drives Resistance to Bednet Insecticides in a Major Malaria Vector.  
793 PLoS Genet. 2015;11(10):e1005618. doi: 10.1371/journal.pgen.1005618.
- 794 **55.** Ingham VA, Jones CM, Pignatelli P, Balabanidou V, Vontas J, Wagstaff SC, et al.  
795 Dissecting the organ specificity of insecticide resistance candidate genes in *Anopheles*  
796 *gambiae*: known and novel candidate genes. BMC Genomics. 2014;15:1018. doi:  
797 10.1186/1471-2164-15-1018.

- 798 **56.** Ranson H, Cornel AJ, Fournier D, Vaughan A, Collins FH, Hemingway J. Cloning and  
799 localization of a glutathione S-transferase class I gene from *Anopheles gambiae*. J Biol  
800 Chem. 1997;272(9):5464-8.
- 801 **57.** Poupardin R, Srisukontarat W, Yunta C, Ranson H. Identification of carboxylesterase  
802 genes implicated in temephos resistance in the dengue vector *Aedes aegypti*. PLoS Negl  
803 Trop Dis. 2014;8(3):e2743. doi: 10.1371/journal.pntd.0002743.
- 804 **58.** WHO. Guidelines for testing mosquito adulticides for indoor residual spraying and  
805 treatment of mosquito nets. Document WHO/CDS/NTD/WHOPES/GCDPP/3, Geneva,  
806 Switzerland, World Health Organization. 2006.
- 807 **59.** Foll M, Gaggiotti O. A genome-scan method to identify selected loci appropriate for  
808 both dominant and codominant markers: a Bayesian perspective. Genetics.  
809 2008;180(2):977-93. doi: 10.1534/genetics.108.092221.
- 810 **60.** Collins FH, Mendez MA, Rasmussen MO, Mehaffey PC, Besansky NJ, Finnerty V. A  
811 ribosomal RNA gene probe differentiates member species of the *Anopheles gambiae*  
812 complex. Am J Trop Med Hyg. 1987;37(1):37-41.

813

## 814 **Figure captions**

815 **Fig 1. Insecticide resistance Levels.** Resistance levels of the different lines to the three  
816 insecticides deltamethrin, bendiocarb and fenitrothion. Black: susceptible strain, Grey: F0  
817 Guy-R composite population, Blue: Delt line, Purple: Bend line, Red: Feni line. A: Resistance  
818 levels of each line to its respective insecticide at the F0 Guy-R, F1 and F2 generations.  
819 Resistance levels are expressed as  $LD_{50} \pm 95\%$  CI. B: Cross-resistance profiles of each line  
820 to all insecticides at the F2 generation. Cross-resistance levels are expressed as % mortality  
821  $\pm$  SD to a single insecticide dose. For each insecticide, letters indicate statistical similarity or  
822 dissimilarity between lines (GLM family = binomial,  $N \geq 4$ ).

823

824 **Fig 2. Evolution of kdr mutations frequencies.** Allelic frequencies variations of the three  
825 kdr mutations V410L, V1016I and F1534C initially present in the F0 Guy-R population in  
826 each line. Allele frequencies were inferred from the number of sequencing reads supporting  
827 each allele at each locus. Empty dots indicate conditions with read coverage < 30.

828

829 **Fig 3. Gene copy number variations associated with insecticide resistance.** For each  
830 line, genes affected by CNV associated with resistance are indicated by stars. CNV data  
831 obtained from F0 Guy-R are repeated for each line for better clarity. Black dots indicate  
832 genes previously identified as affected by CNV associated with deltamethrin resistance in  
833 Faucon et al. [26]. The genomic location of each gene on chromosomes and gene clusters  
834 architecture is shown on the right (red: CNV associated with resistance, brown: CNV not  
835 associated with resistance, grey: genes not included in the targeted regions). The Venn

836 diagram indicates the number of genes affected by CNV associated with resistance in each  
837 line.

838

839 **Fig 4. Selection signatures associated with insecticide resistance.** For each line, region  
840 under selection were identified based on the presence of differential polymorphisms from  
841 allele frequency filtering (red dots, see methods for filtering conditions) and the presence of  
842 loci displaying low Q values in both F0 and F2 conditions. Q values were computed  
843 separately in F0 (left arm) and F2 conditions (right arm) and Q values = 0 were fixed at  $10^{-1000}$   
844 for better clarity. Horizontal grey lines indicate genomic regions showing strong selection  
845 signatures associated with resistance. For each region the names of potential resistance  
846 genes located within a 50 kb range are indicated. Grey dots indicate genomic regions  
847 carrying genes affected by differential non-synonymous variations associated with resistance  
848 as shown in Fig 5.

849

850 **Fig 5. Non-synonymous polymorphisms associated with insecticide resistance.** The  
851 Venn diagram indicates the number of non-synonymous polymorphisms identified in each  
852 line. The heat map shows allele frequencies in each condition. For each variation the allele  
853 represented on the heat map is indicated in blue. Allele frequency data obtained from F0  
854 Guy-R are repeated for each line for better clarity. For each line, stars indicate non-  
855 synonymous polymorphisms associated with resistance based on their expected allele  
856 frequency profile across all conditions. Grey dots indicate non synonymous polymorphisms  
857 located in genomic regions showing strong selection signatures as shown in Fig 4. For each  
858 variation the following annotations are shown: genomic location on chromosome, reference  
859 nucleotide > variant nucleotide, amino acid position, amino acid change (fs= frame shift),  
860 gene accession number, gene name.

861

862 **Fig 6. Experimental design overview.** Insecticide survival segregation steps are shown as  
863 dashed arrows with the corresponding lethal dose (LD) indicated. Colors indicate insecticide  
864 lines (blue: Delt-line, purple: Bend-line, red: Feni-line). The initial resistant composite  
865 population (F0 Guy-R) and the susceptible strain (Susc) are shown in black and grey  
866 respectively. Large dots indicate samples used for targeted DNA-seq.

867

## 868 **Supplementary materials**

869 **S1 Fig. Cross-validation of kdr mutation frequencies obtained by mass sequencing  
870 and individual genotyping.** Blue dots show the allele frequency obtained by targeted DNA-  
871 seq with the total read coverage indicated for each condition. Empty blue dots designate

872 conditions for which the total read coverage was < 30. Triangles designate allele frequencies  
873 obtained by qPCR genotyping with the number of genotyped individual indicated for each  
874 condition.

875

876 **S1 Table. CNV data set.** This table shows the mean relative copy number of each gene  
877 across all F0 and F2 conditions. Relative gene copy numbers were obtained by comparing  
878 the normalized coverage of each target region to a common reference made from all  
879 samples. Only regions showing a mean coverage between 30 and 850 in all samples were  
880 considered. Relative copy numbers were then averaged per gene and centered-reduced in  
881 order to minimize stochastic variations. Genes affected by CNV associated with resistance to  
882 each insecticide are indicated.

883

884 **S2 Table. Polymorphism data set overview.** This table describes the overall  
885 polymorphisms data set. Polymorphisms counts and percentages are given for the following  
886 categories: passing QC filters and polymorphic across samples, differential in each line, non-  
887 synonymous differential in each line.

888

889 **S3 Table. Polymorphism data set.** This table describes all variations passing QC filters and  
890 polymorphic across samples. For each variation, the following attributes are listed: location  
891 (chromosome, start, end), reference and variant allele, polymorphisms type, target region  
892 type, variant allele frequency in each condition, differential based on allele frequency filtering  
893 (Yes or No for each line), Bayescan  $-\text{Log}_{10}$  Q value (for F0 and F2 condition in each line),  
894 genic effect based on AaegL5.1 annotation (effect, affected gene accession and description,  
895 AA change, cDNA position/effect, protein position/effect).

896

897 **S4 Table. Genomic regions targeted by DNA-seq.** This table describes all genomic  
898 regions targeted by DNA-seq. For each target region, the following information are shown:  
899 AaegL5 location (chromosome, start, end, length), AaegL3 location (supercontig: start-end,  
900 length), marker type (genomic “marker”, gene “promoter” or “gene”), short description,  
901 protein family.

902

903 **Figure 1.**

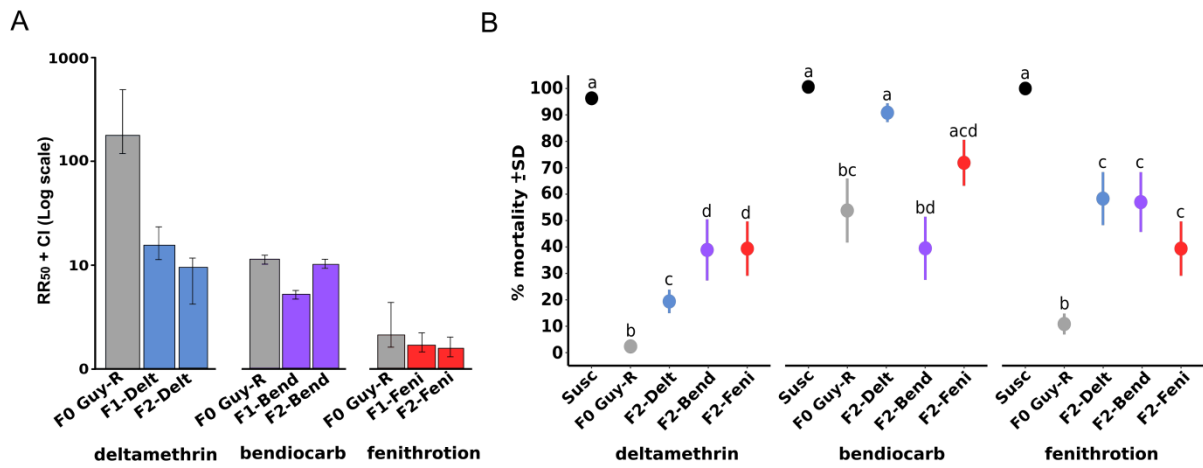

904

905 **Figure 2.**

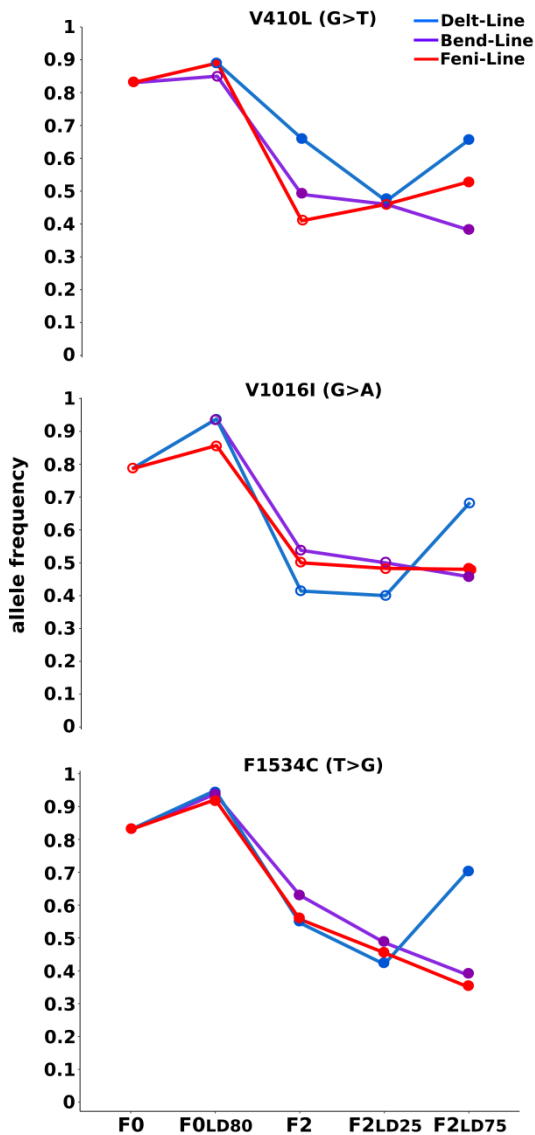







930 **Figure 5.**

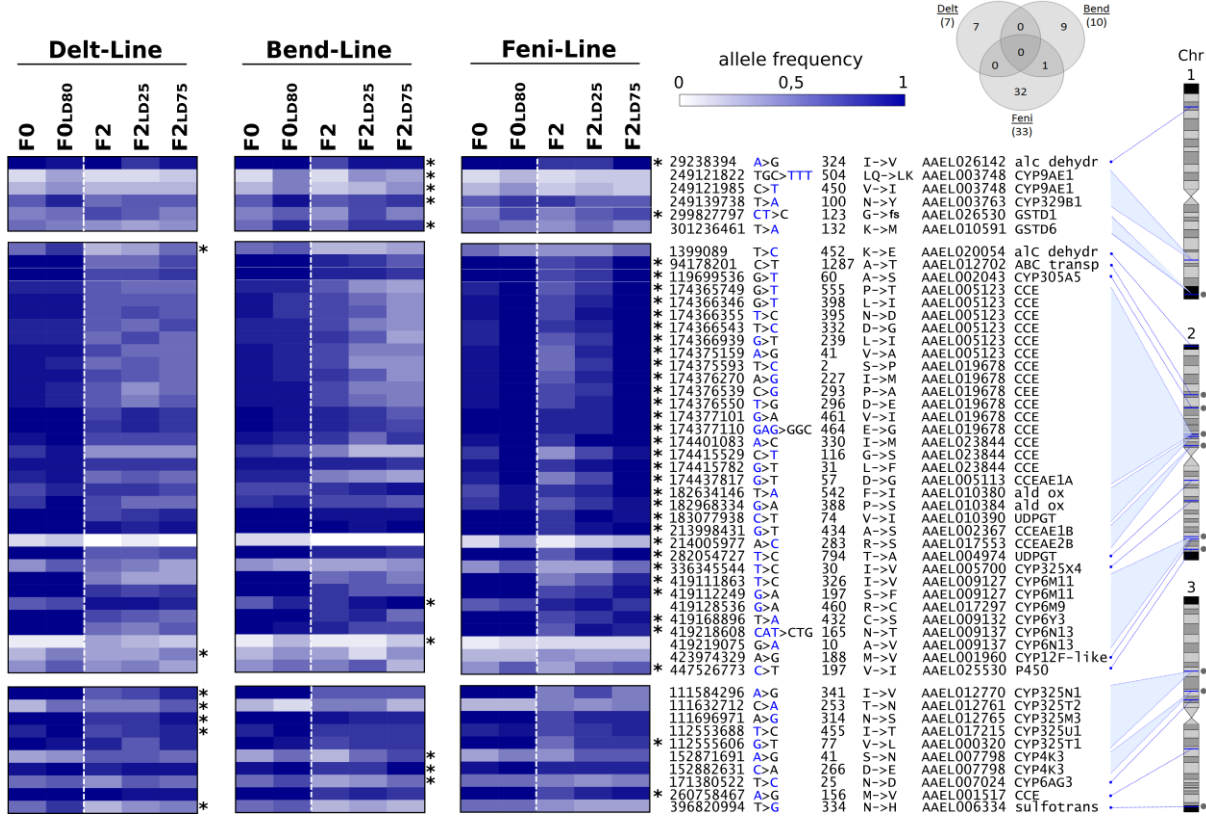

931

932

933 **Figure 6.**

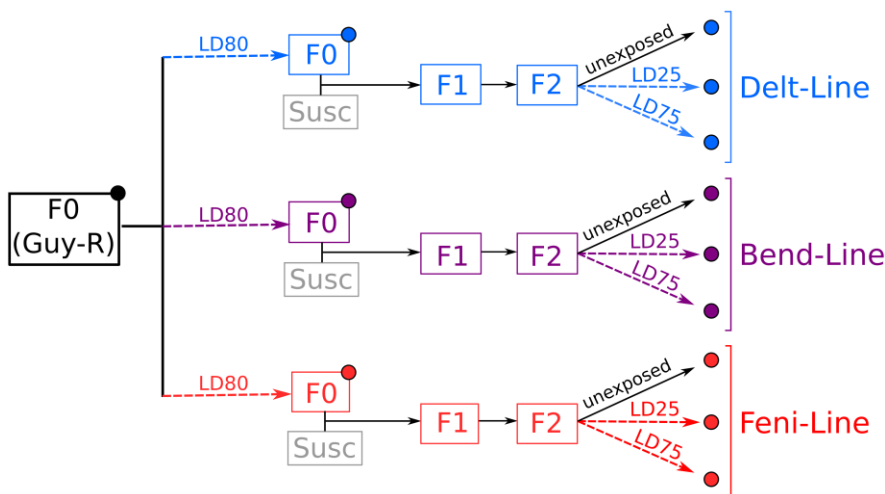

934

A

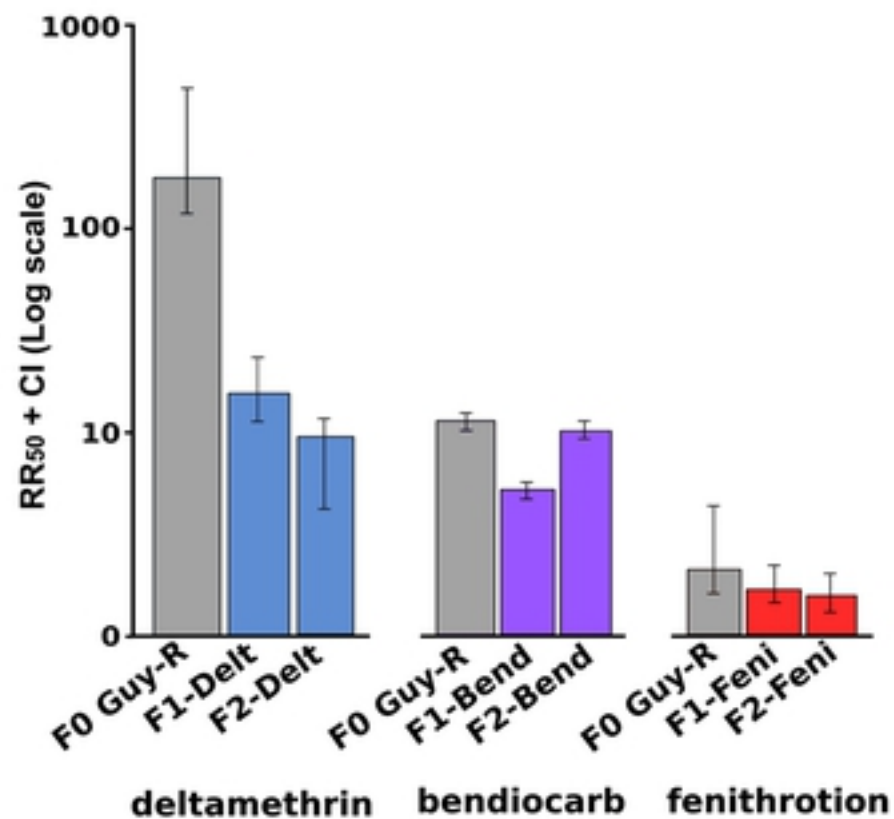

B

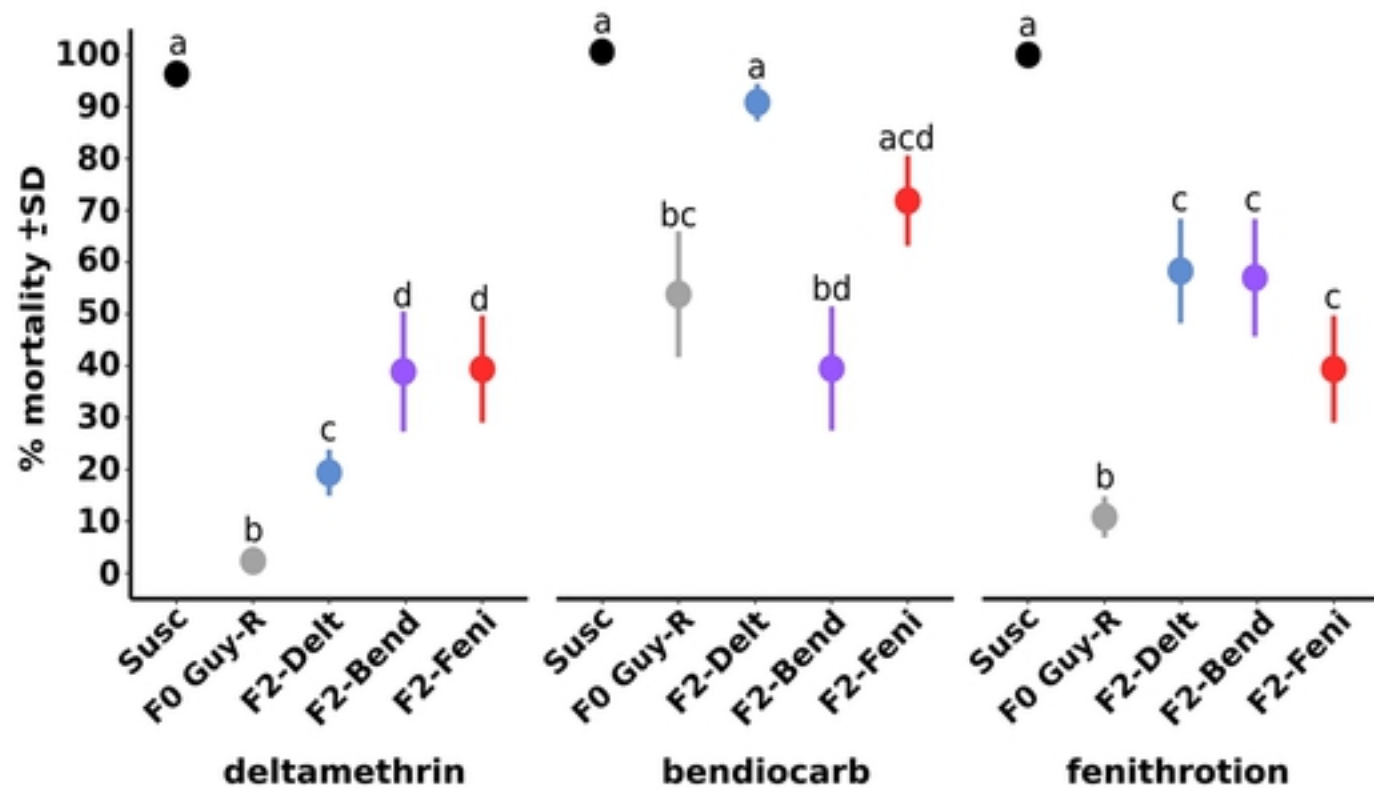

Figure 1 (high resolution)

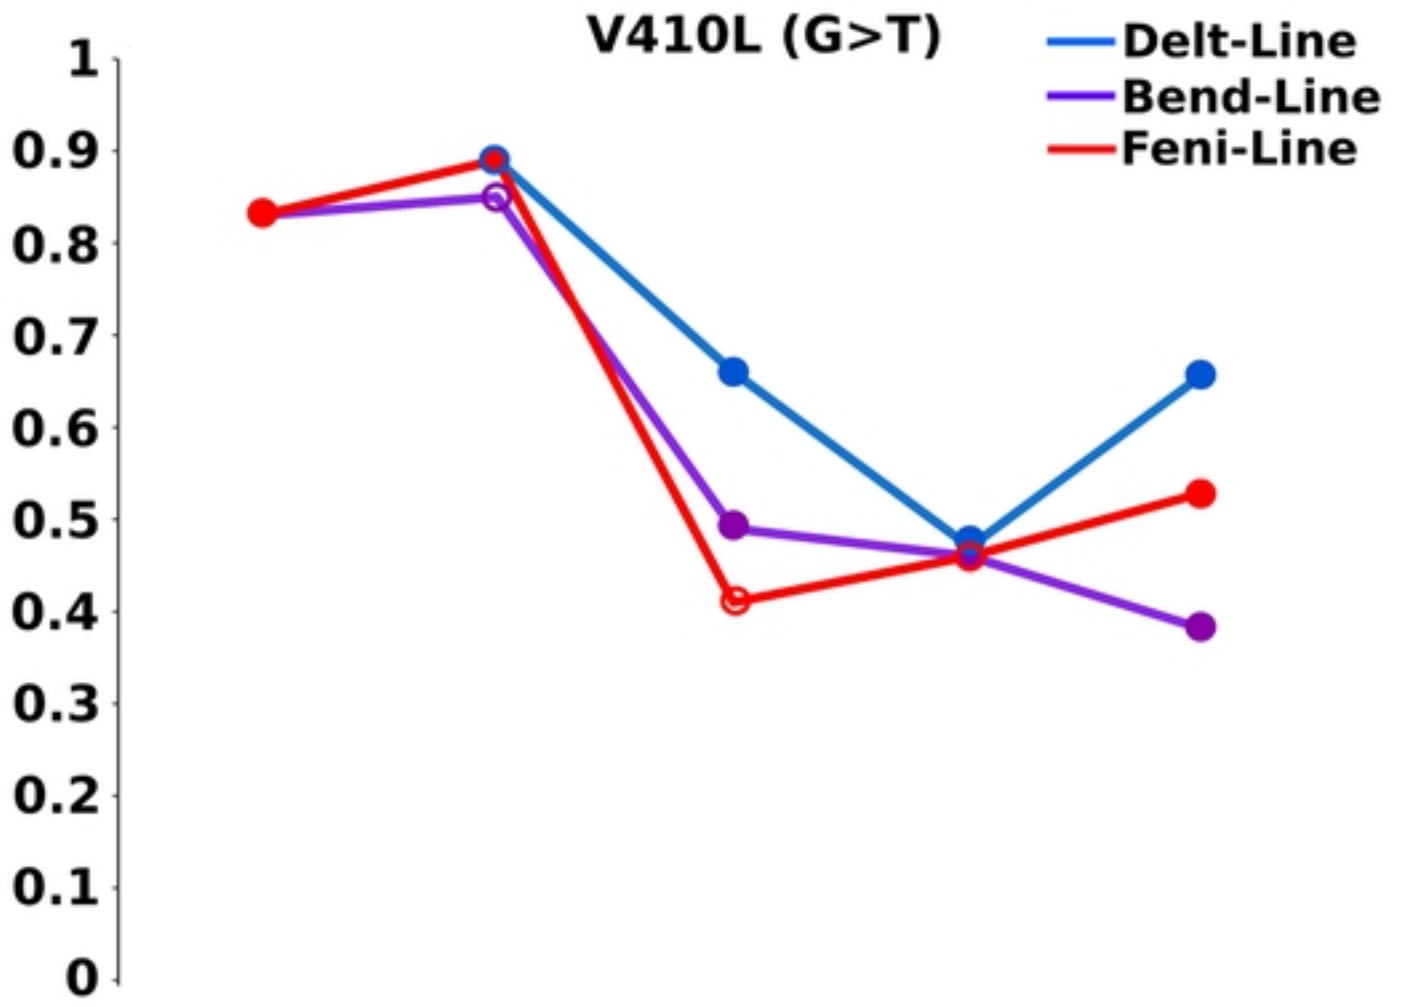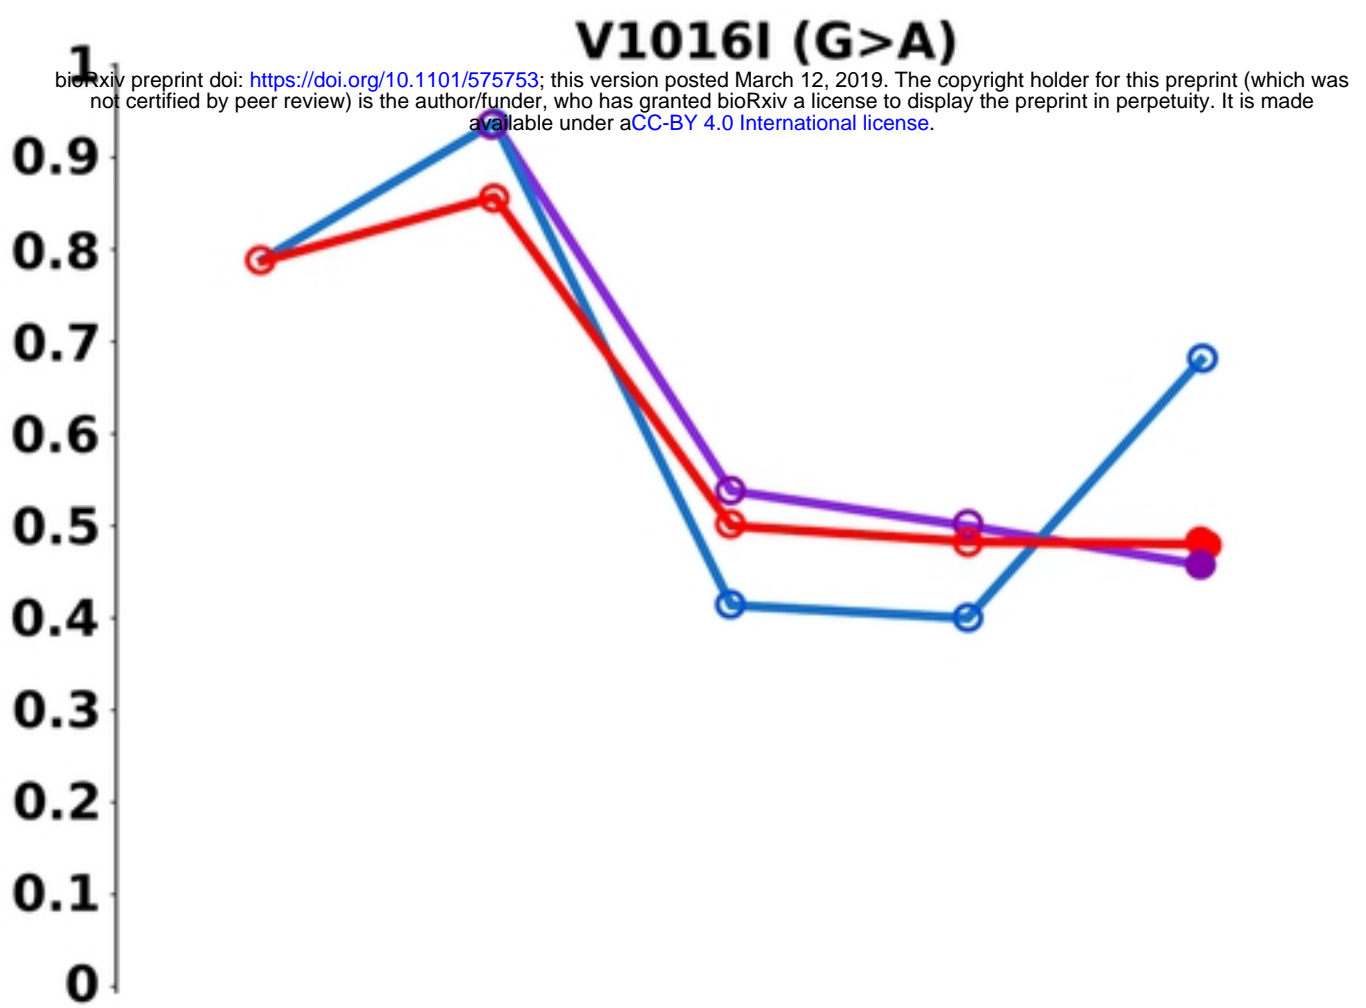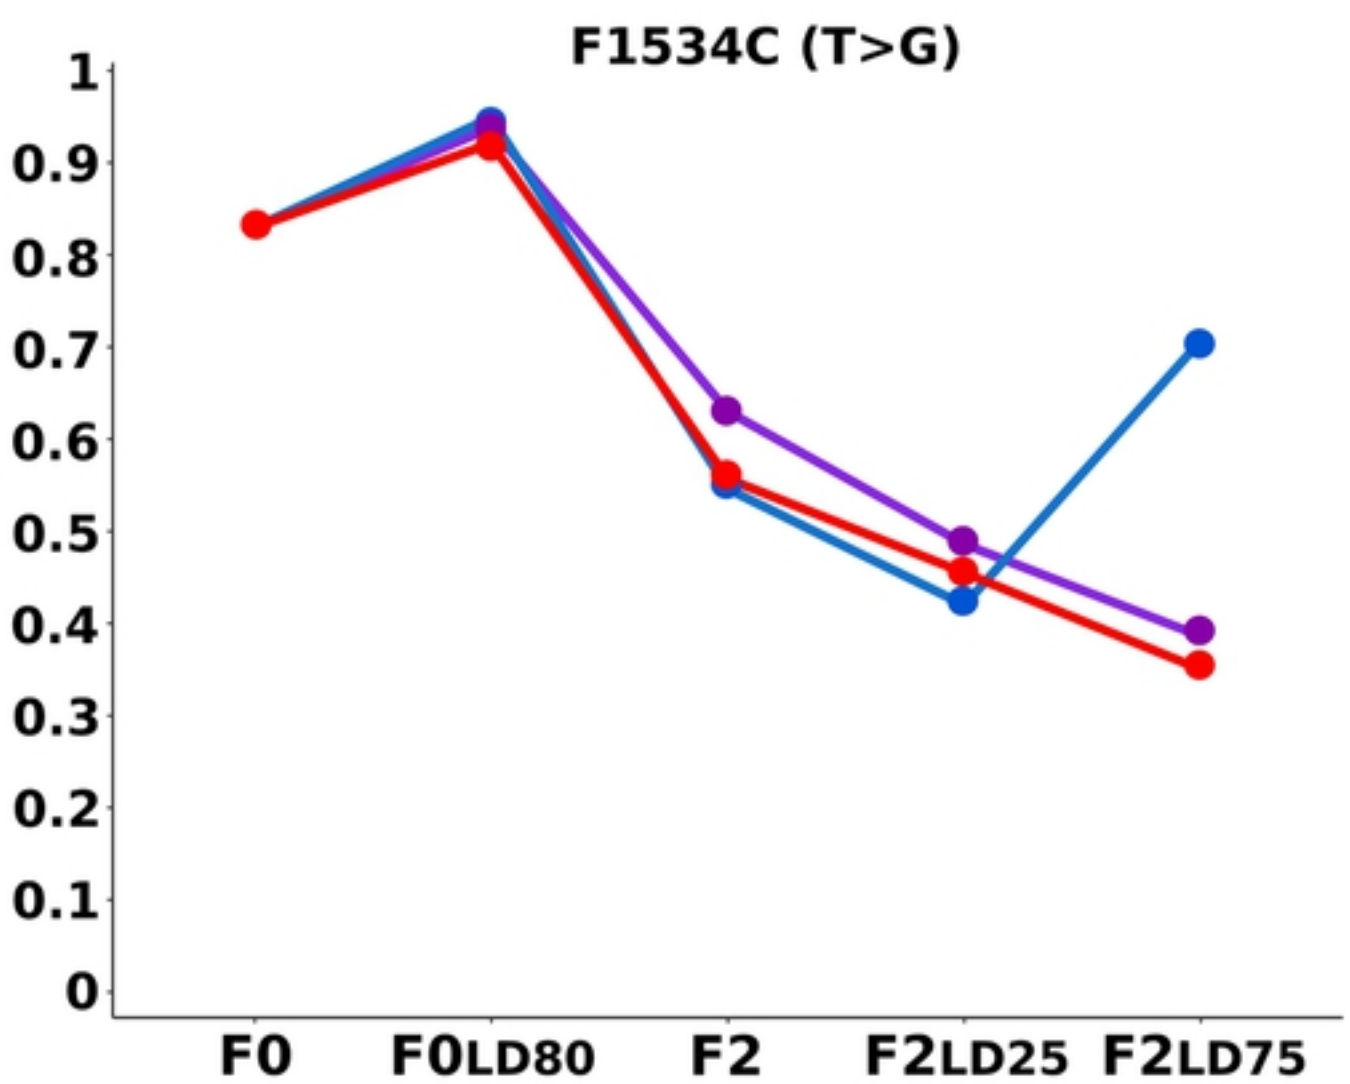

Figure 2 (high resolution)

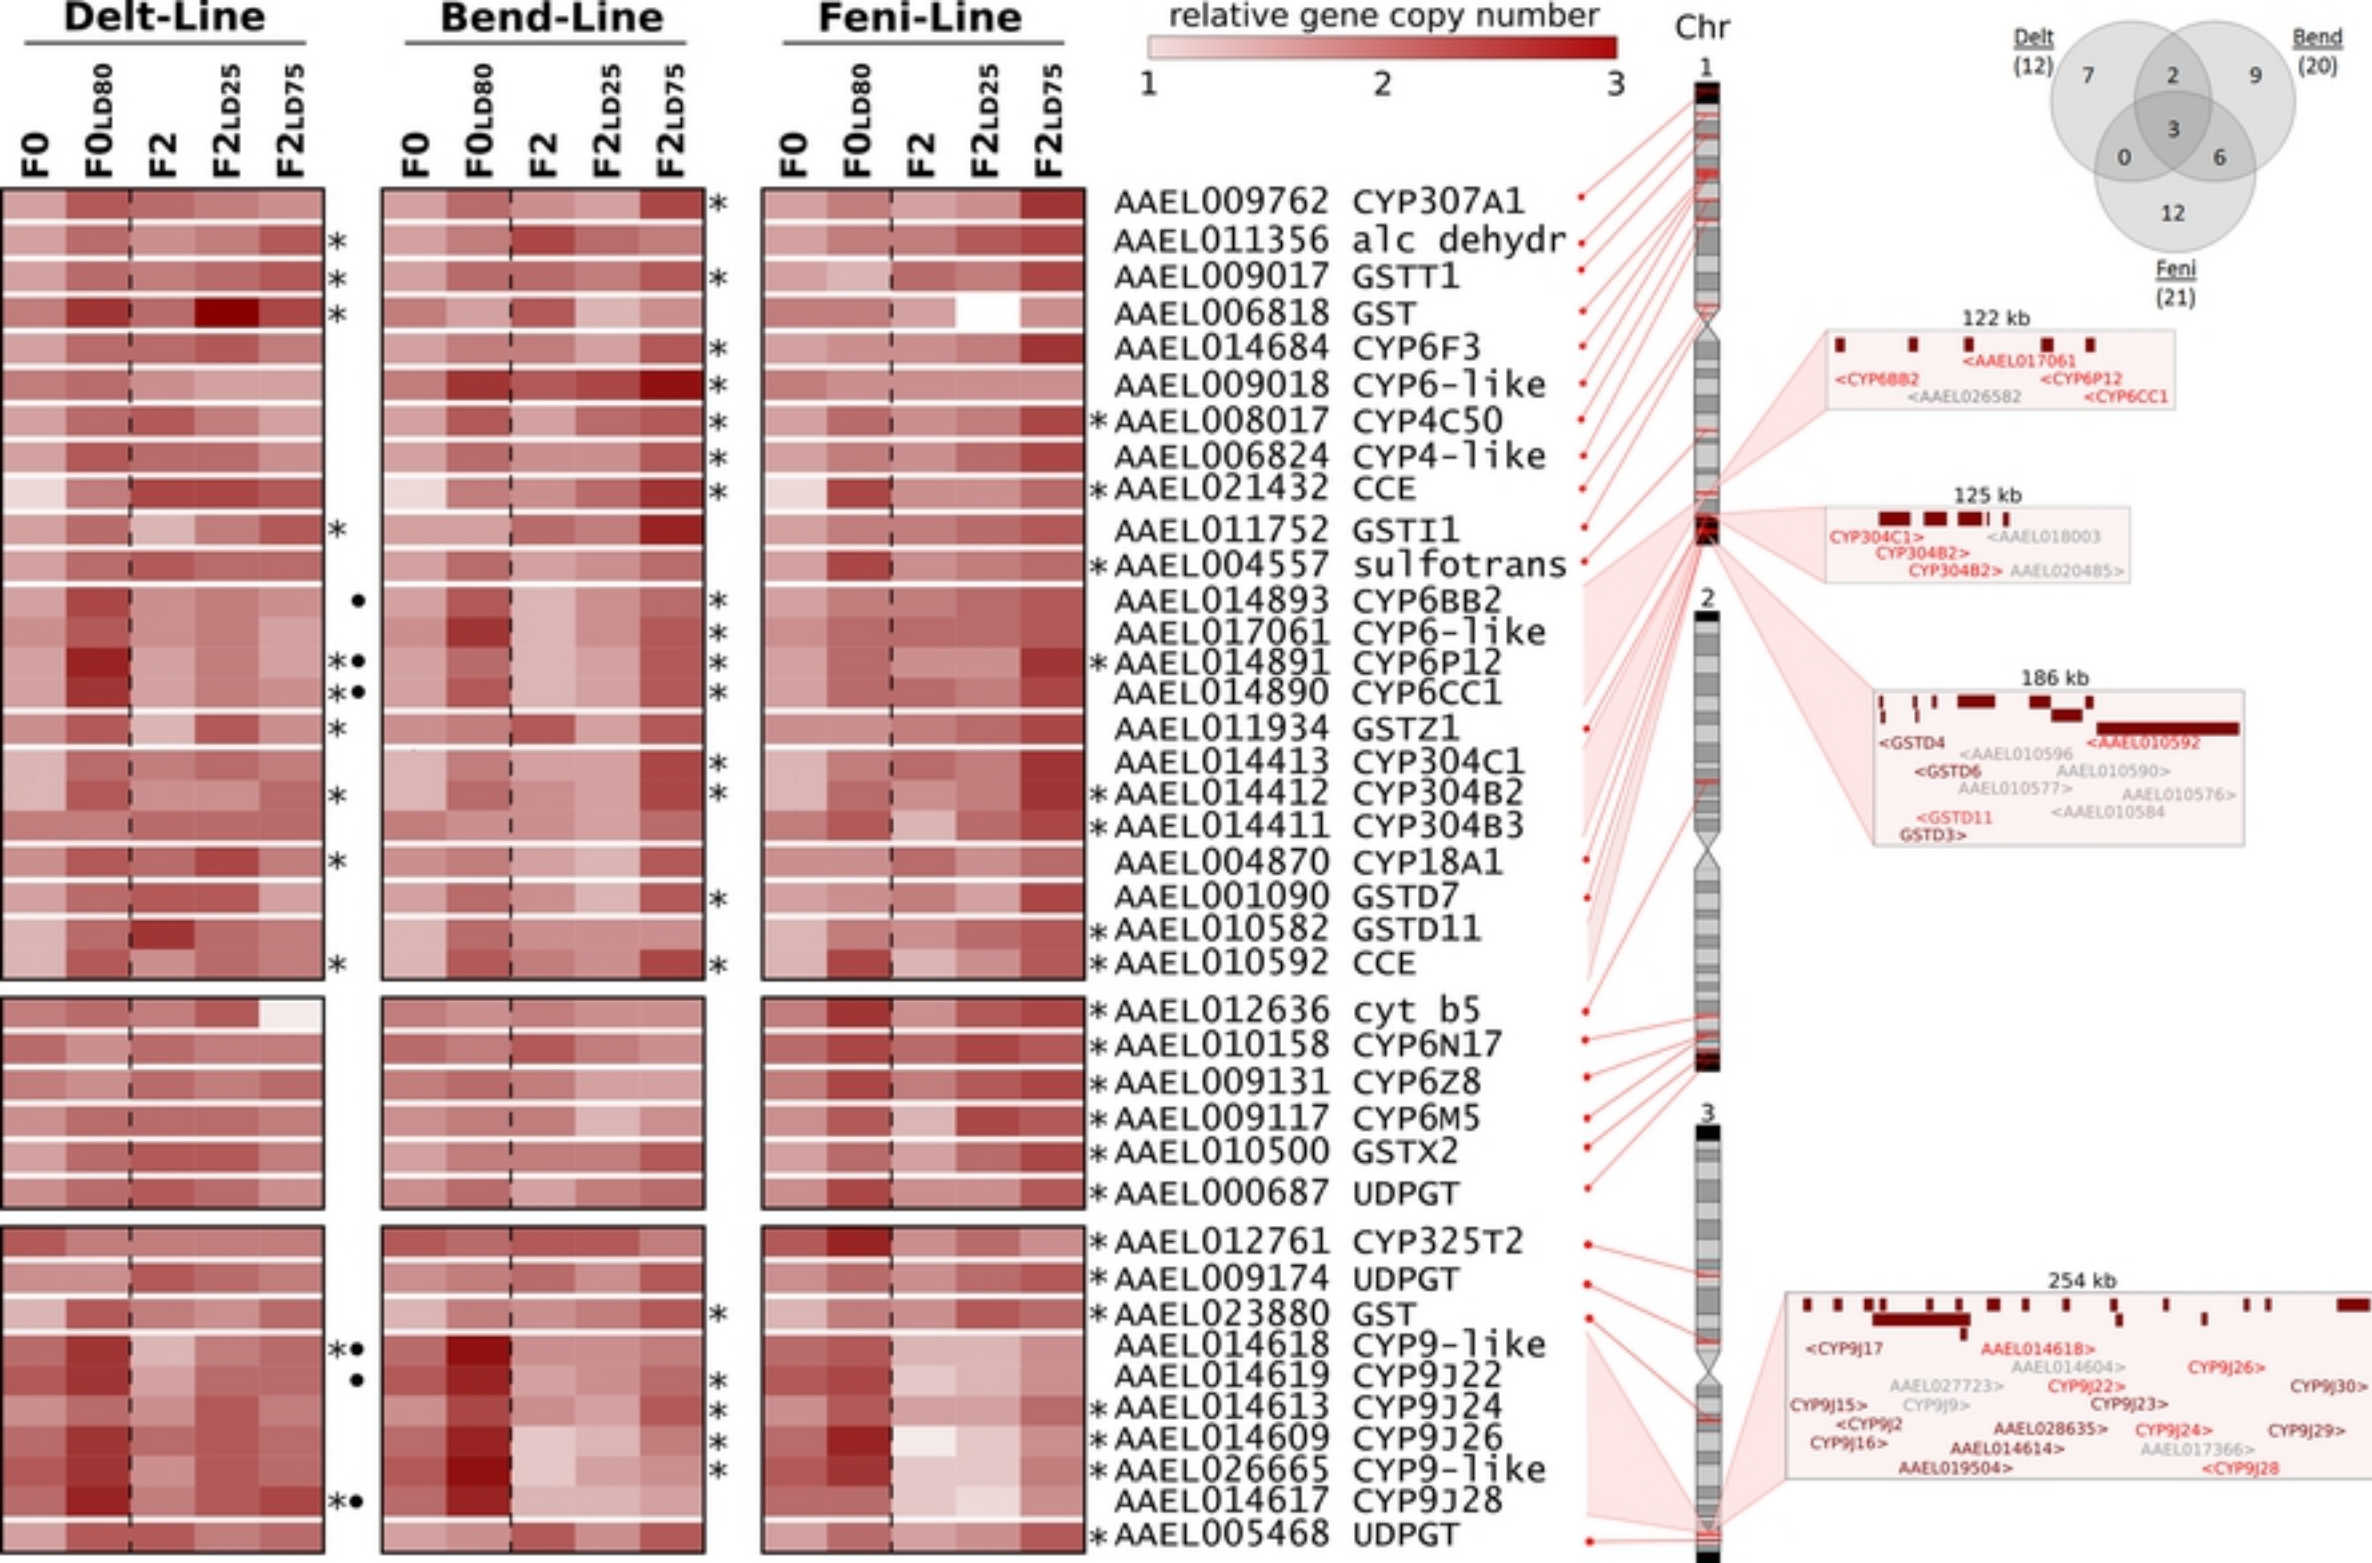

Figure 3 (high resolution)



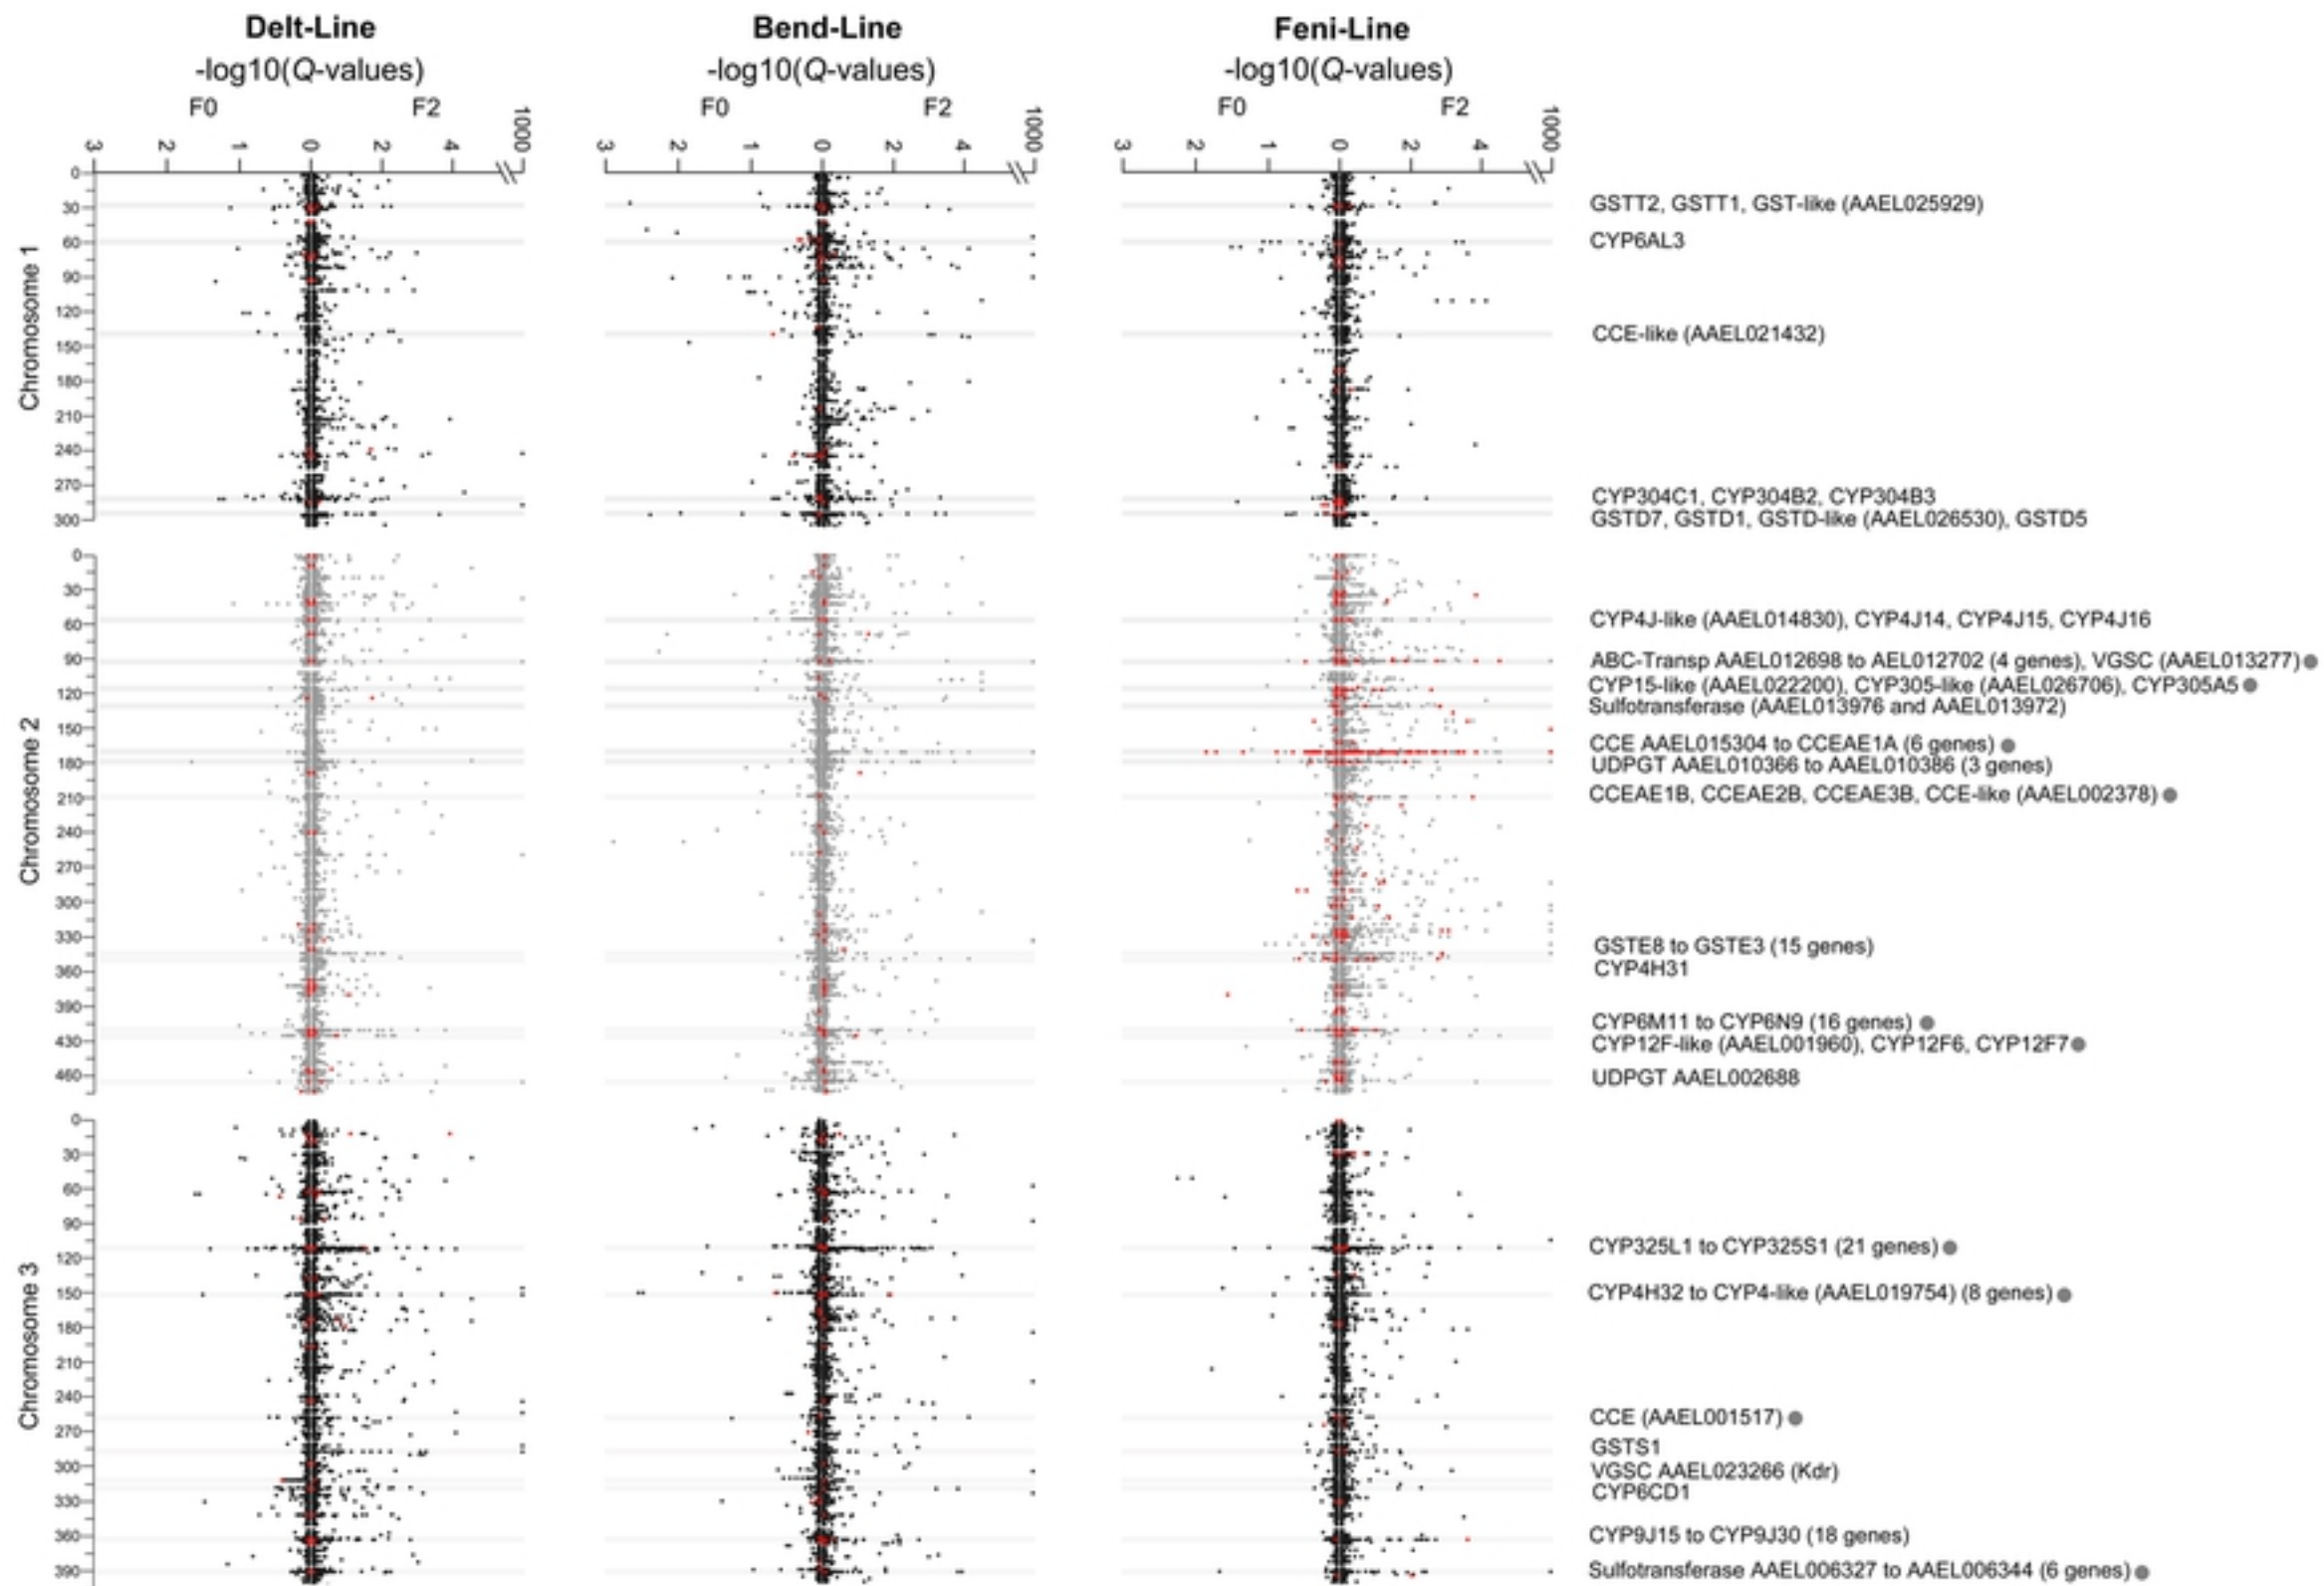

Figure 4 (high resolution)



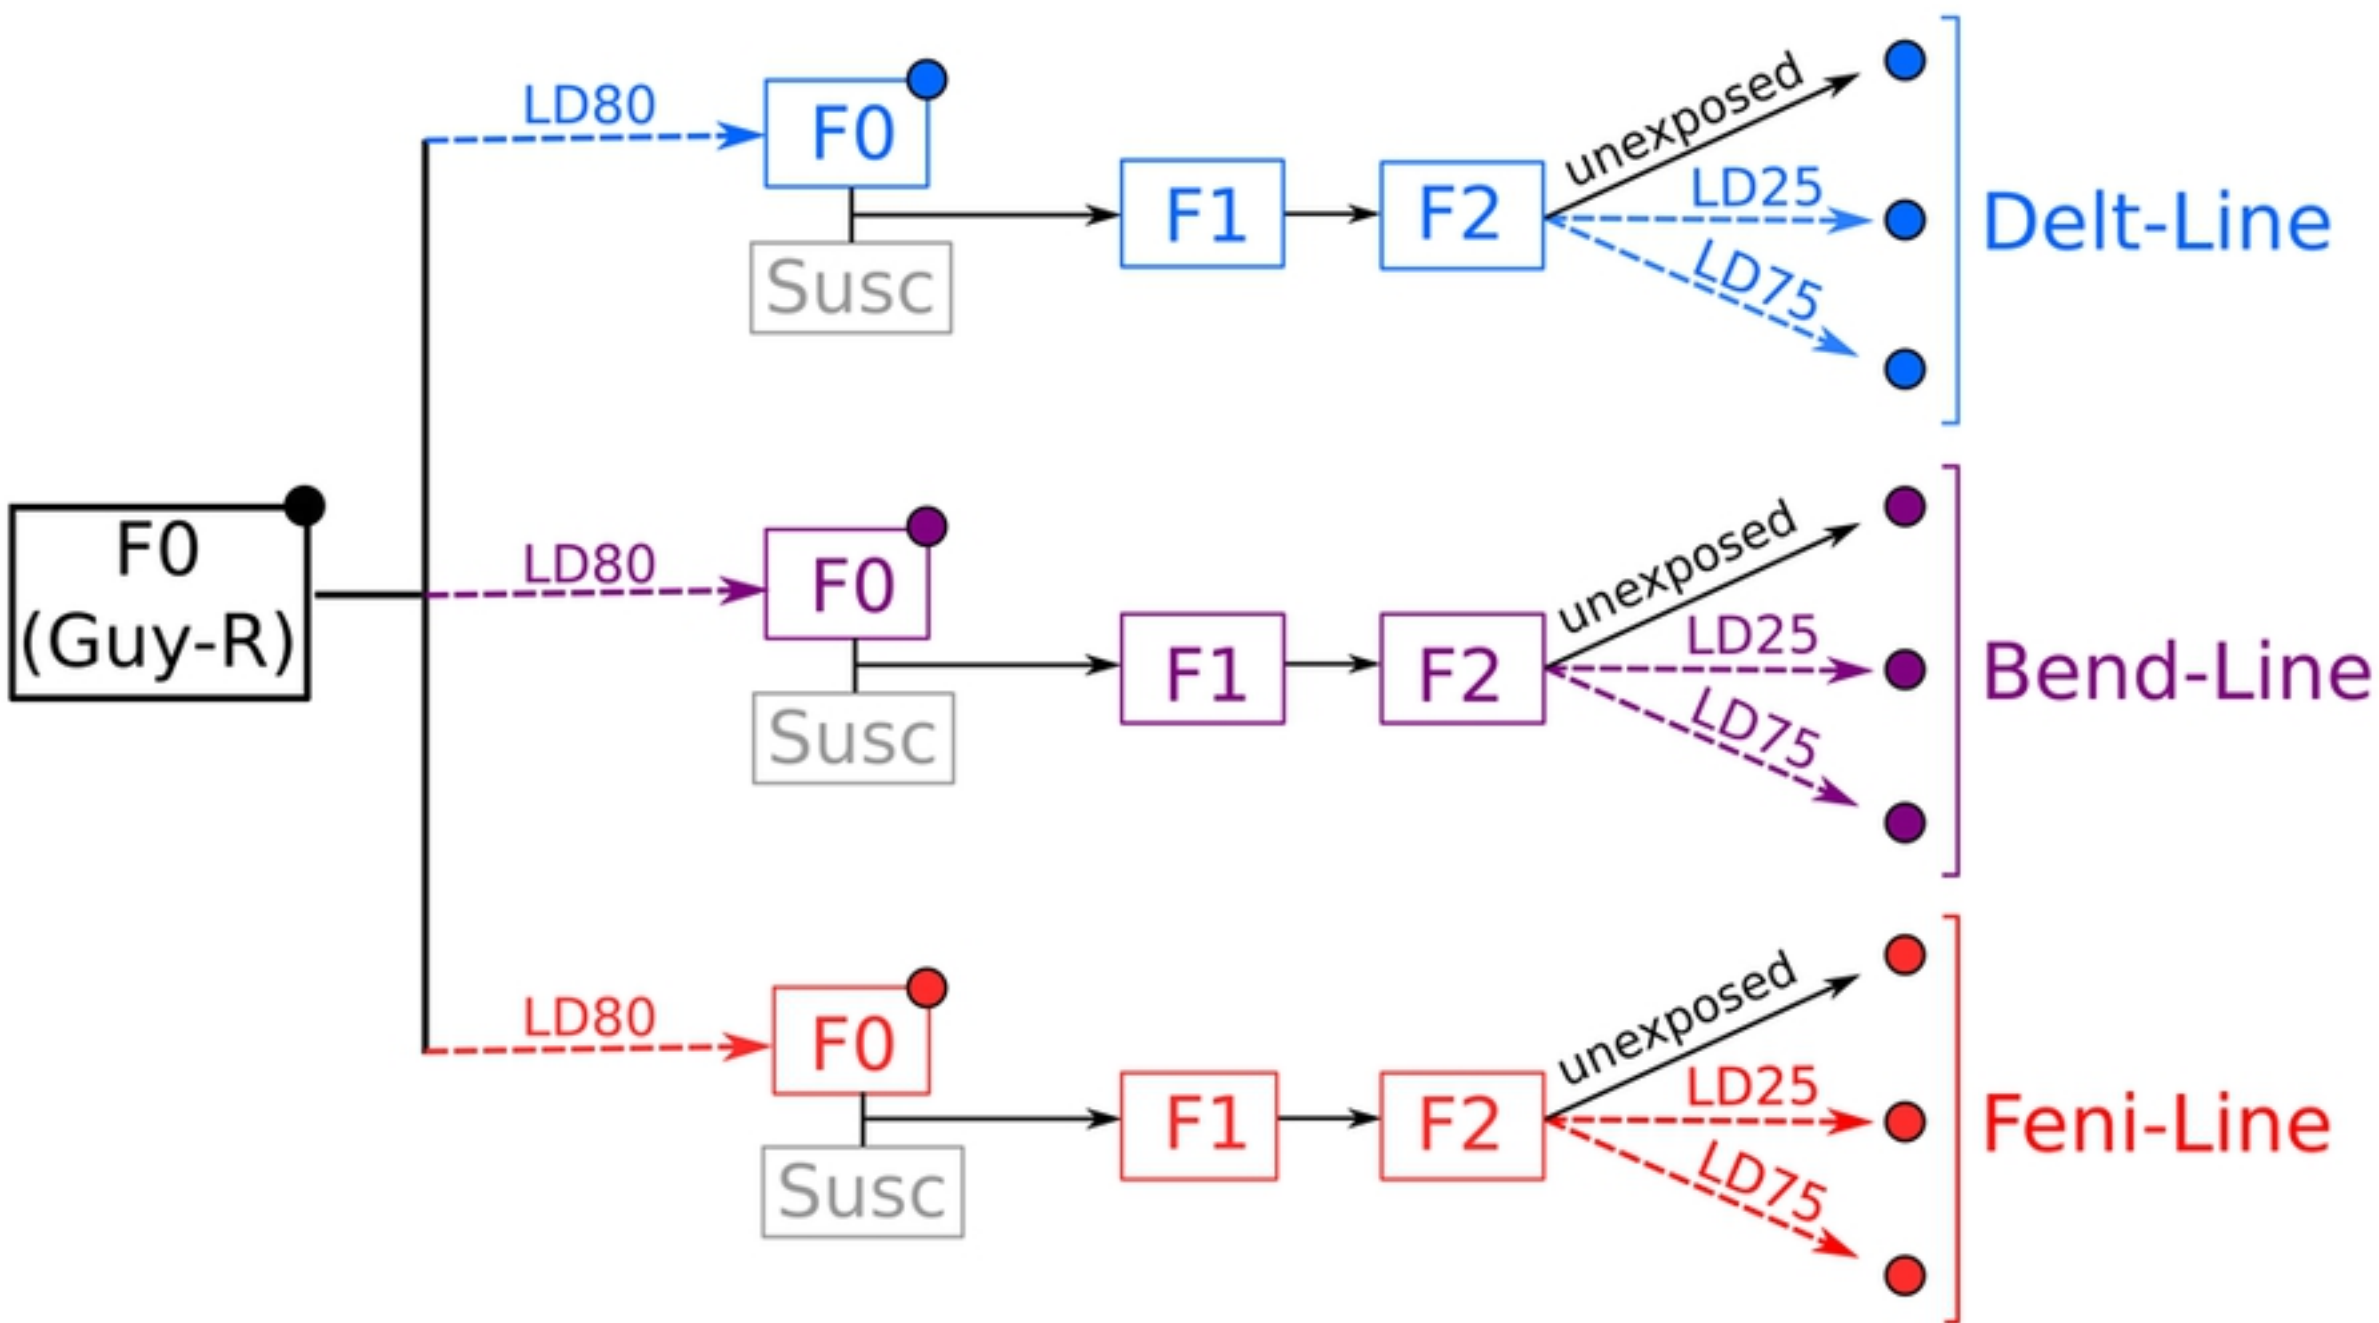

Figure 6 (high resolution)
